# Supplementary material
Source: PubMed Central journal article supplement (PMC7444660)
Supplement: NIHMS1617529-supplement-supplementary_information.pdf [file NIHMS1617529-supplement-supplementary_information.pdf]

## Supporting Information

### **Discovery, Radiolabeling, and Evaluation of Subtype-Selective Inhibitors for Positron Emission Tomography Imaging of Brain Phosphodiesterase-4D**

Yuichi Wakabayashi,<sup>1\*</sup> Sanjay Telu<sup>1\*</sup>, Rachel M. Dick<sup>1</sup>, Masahiro Fujita<sup>1</sup>, Maarten Ooms<sup>1</sup>, Cheryl L. Morse<sup>1</sup>, Jehi-San Liow<sup>1</sup>, Jinsoo S Hong<sup>1</sup>, Robert L. Gladding,<sup>1</sup> Lester S. Manly<sup>1</sup>, Sami S. Zoghbi<sup>1</sup>, Xuesheng Mo<sup>2</sup>, Emily C. D'Amato<sup>2</sup>, Janice A. Sindac<sup>2</sup>, Richard A. Nugent<sup>2</sup>, Brian E. Marron<sup>2</sup>, Mark E. Gurney<sup>2§</sup>, Robert B. Innis<sup>1</sup>, Victor W. Pike<sup>1§</sup>

<sup>1</sup>National Institute of Mental Health, Bethesda, MD, USA

<sup>2</sup>Tetra Therapeutics, Grand Rapids, MI, USA

- Equal authorship priority

## Table of Contents

| Topic                                                                                                                                            | Display item                              | Page       |
|--------------------------------------------------------------------------------------------------------------------------------------------------|-------------------------------------------|------------|
| Time-sequence for reduction in $clogP$ across the different chemical series                                                                      | <b>Figure S1</b>                          | <b>S3</b>  |
| Syntheses of desmethyl precursors <b>7–10</b>                                                                                                    | <b>Scheme 1</b>                           | <b>S4</b>  |
| Radioligand HPLC purification conditions                                                                                                         | <b>Table S1</b>                           | <b>S6</b>  |
| Radioligand HPLC analysis conditions                                                                                                             | <b>Table S2</b>                           | <b>S6</b>  |
| [ <sup>11</sup> C] <b>3</b> ([ <sup>11</sup> C]T1953) HPLC Chromatograms                                                                         | <b>Figure S2</b>                          | <b>S7</b>  |
| [ <sup>11</sup> C] <b>4</b> ([ <sup>11</sup> C]T2525) HPLC Chromatograms                                                                         | <b>Figure S3</b>                          | <b>S8</b>  |
| [ <sup>11</sup> C] <b>5</b> ([ <sup>11</sup> C]T1660) HPLC Chromatograms                                                                         | <b>Figure S4</b>                          | <b>S9</b>  |
| [ <sup>11</sup> C] <b>6</b> ([ <sup>11</sup> C]T1650) HPLC Chromatograms                                                                         | <b>Figure S5</b>                          | <b>S10</b> |
| [ <sup>11</sup> C] <b>6</b> ([ <sup>11</sup> C]T1650) HPLC Chromatograms for production in a CGMP laboratory                                     | <b>Figure S6</b>                          | <b>S11</b> |
| Yields and $A_m$ of PDE4D radioligands evaluated in monkey                                                                                       | <b>Table S3</b>                           | <b>S12</b> |
| Measured lipophilicities ( $mlogD_{7.4}$ ) and monkey and human plasma free fractions ( $f_p$ ) at baseline for tested radioligands.             | <b>Table S4</b>                           | <b>S12</b> |
| Data from PET experiments with [ <sup>11</sup> C] <b>4</b> ([ <sup>11</sup> C]T2525) in monkey                                                   | <b>Figure S7</b>                          | <b>S14</b> |
| Data from PET experiments with [ <sup>11</sup> C] <b>3</b> ([ <sup>11</sup> C]T1953) in monkey                                                   | <b>Figure S8</b>                          | <b>S15</b> |
| Data from PET experiments with [ <sup>11</sup> C] <b>5</b> ([ <sup>11</sup> C]T1660) in monkey                                                   | <b>Figure S9</b>                          | <b>S16</b> |
| Data from PET experiments with [ <sup>11</sup> C] <b>6</b> ([ <sup>11</sup> C]T1650) in monkey                                                   | <b>Figure S10</b>                         | <b>S16</b> |
| HPLC analyses of the radiometabolites of [ <sup>11</sup> C] <b>6</b> ([ <sup>11</sup> C]T1650) generated over 30 min in various tissues          | <b>Figure S11</b>                         | <b>S17</b> |
| Time-course of radioactive species in human plasma following intravenous administration of [ <sup>11</sup> C] <b>6</b> ([ <sup>11</sup> C]T1650) | <b>Figure S12</b>                         | <b>S18</b> |
| Average $AUC$ for SUV from 60 to 120 minutes for two human participants                                                                          | <b>Figure S13</b>                         | <b>S19</b> |
| Appendix 1: Characterization data for compounds <b>3–10</b>                                                                                      | <b>NMR spectra, MS spectra, HPLC data</b> | <b>S20</b> |

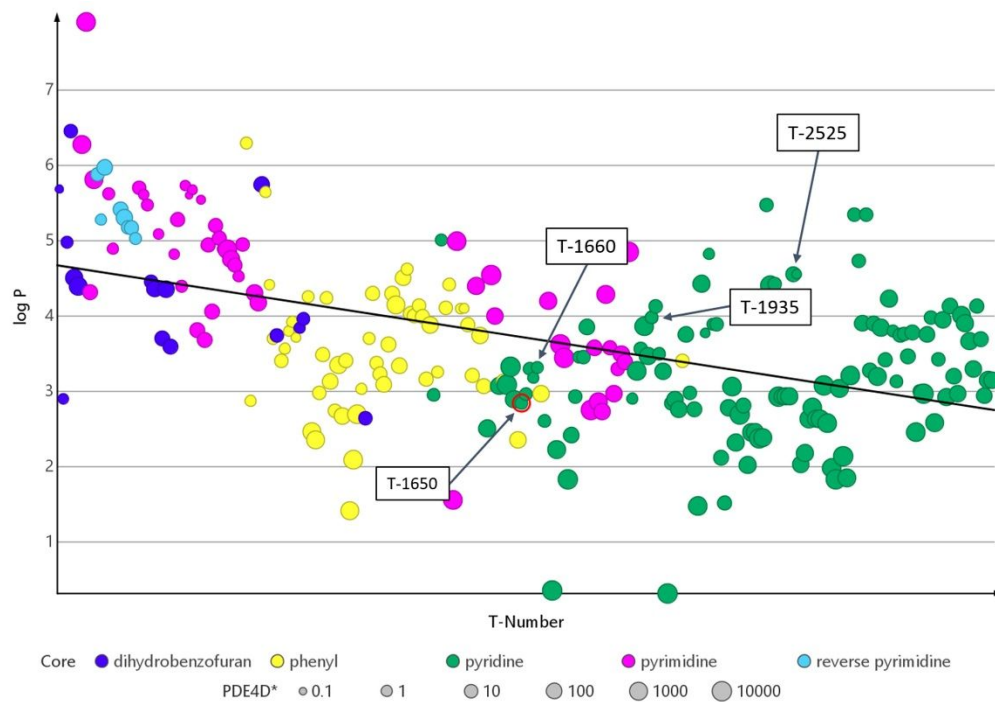

**Figure S1.** Time-sequence for reduction in  $\text{clog}P$  across the different chemical series. Compounds evaluated in monkey PET studies are named. The PDE4D inhibitory potency is shown by the size of the symbol.

## Syntheses of desmethyl precursors 7–10

(See Appendix 1 for characterization data: HPLC analyses, mass, and <sup>1</sup>H- and <sup>13</sup>C-NMR spectra).

### Scheme S1. Synthesis of desmethyl precursors

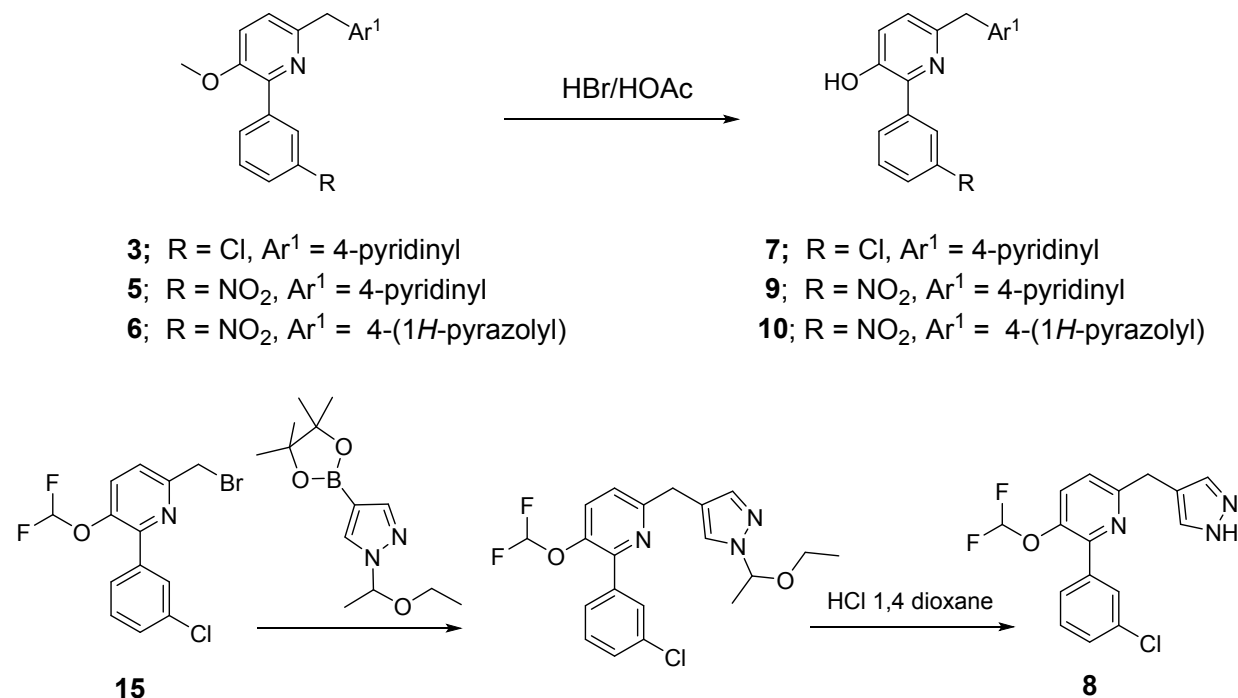

**Preparation of 2-(3-chlorophenyl)-3-hydroxy-6-[(pyridin-4-yl)methyl]pyridine (7; T2009).** Compound **3** (T1953; 55 mg, 0.18 mmol) was dissolved in AcOH (2 mL) and treated with 48% HBr (3 mL). The vial was heated to 120 °C for 48 h. The reaction mixture was condensed and then neutralized carefully with NaHCO<sub>3</sub> solution. The product was extracted 3 times with ethyl acetate, dried with Na<sub>2</sub>SO<sub>4</sub>, and concentrated, and then purified by silica gel chromatography (EtOAc/DCM, 1:1) to give **7** as a white solid: 44 mg (0.15 mmol, 82%); <sup>1</sup>H NMR (DMSO-*d*<sub>6</sub>, 400 MHz) δ 10.2 (s, 1H), 8.47 (d, *J* = 5.6 Hz, 2H), 8.05 (m, 3H), 7.96 (m, 1H), 7.44 (m, 2H), 7.31 (m, 3H), 7.17 (d, *J* = 8.3 Hz, 2H), 4.08 (s, 2H); TOF MS ES<sup>+</sup> *m/z* 297.0 [M+H]<sup>+</sup>; HPLC Method A, *t*<sub>R</sub> = 2.23 min.

**Preparation of 3-hydroxy-2-(3-nitrophenyl)-6-[(pyridin-4-yl)methyl]pyridine (9; T1842).** Using the method of compound **7** and purification by silica gel chromatography (5% MeOH/DCM) gave **9** as a white solid: (56%); <sup>1</sup>H NMR (DMSO-*d*<sub>6</sub>, 400 MHz) δ 10.51 (s, 1H), 8.93 (t, *J* = 1.9 Hz, 1H), 8.54 (d, *J* = 8.0 Hz, 1H), 8.47 (d, *J* = 5.9 Hz, 1H), 8.22 (m, 1H), 7.74 (t, *J* = 8.1 Hz, 1H), 7.34 (m, 3H), 7.23 (d, *J* = 8.0 Hz, 1H), 4.11 (s, 2H); TOF MS ES<sup>+</sup> *m/z* 308.1 [M+H]<sup>+</sup>; HPLC Method A, *t*<sub>R</sub> = 2.25 min.

**Preparation of 2-(3-nitrophenyl)-3-hydroxy-6-[(1*H*-pyrazol-4-yl)methyl]pyridin-3-ol (10; T1720).** Using the method of compound **7** and purification by silica gel chromatography (3–10% MeOH/DCM) gave **10** as a white solid: (45%); <sup>1</sup>H NMR (DMSO-*d*<sub>6</sub>, 400 MHz) δ 12.59 (s, 1H),

10.37 (s, 1H), 8.96 (t,  $J = 1.9$  Hz, 1H), 8.57 (dt,  $J = 8.0, 1.2$  Hz, 1H), 8.22 (ddd, 8.2 Hz, 2.3 Hz, 1.0 Hz, 1 H), 7.75 (t,  $J = 8.1$  Hz, 1H), 7.55 (br s, 2H), 7.34 (d,  $J = 8.3$  Hz, 1H), 7.14 (d,  $J = 8.3$  Hz, 1 H), 3.92 (s, 2H); TOF MS ES<sup>+</sup>  $m/z$  296.9 [M+H]<sup>+</sup>; HPLC Method B,  $t_R = 2.37$  min.

**Preparation of 2-(3-chlorophenyl)-3-(difluoromethoxy)-6-[(1H-pyrazol-4-yl)methyl]pyridine (8; T2517)**

*2-(3-Chlorophenyl)-3-(difluoromethoxy)-6-[(1-ethoxyethyl-1H-pyrazol-4-yl)methyl]pyridine*. In a 25-mL round bottom flask, 6-(bromomethyl)-2-(3-chlorophenyl)-3-difluoromethoxypyridine (**15**; 490 mg, 1.41 mmol) was dissolved in 1,4-dioxane:water (4:1, 6 mL) and then treated with 1-(1-ethoxyethyl)-4-(4,4,5,5-tetramethyl-1,3,2-dioxaborolan-2-yl)-1H-pyrazole (750 mg, 2.82 mmol), K<sub>3</sub>PO<sub>4</sub> (600 mg, 2.83 mmol), and Pd(dppf)Cl<sub>2</sub> (110 mg, 0.15 mmol). Argon was bubbled through the solution for 5 min, then the flask was sealed under argon and heated at 90 °C for 12 h. The reaction mixture was concentrated under reduced pressure and the residue partitioned between ethyl acetate and water. The layers were separated, and the organic phase dried with Na<sub>2</sub>SO<sub>4</sub> and concentrated. The crude product was purified by silica gel chromatography using 100% DCM to give the product as a white solid: 150 mg (0.39 mmol, 28%).

*2-(3-Chlorophenyl)-3-(difluoromethoxy)-6-[(1H-pyrazol-4-yl)methyl]pyridine (8; T2517)*: To a solution of 2-(3-chlorophenyl)-3-(difluoromethoxy)-6-[(1-ethoxyethyl-1H-pyrazol-4-yl)methyl]pyridine (140 mg, 0.37 mmol) in MeOH (2 mL) was added water (50 μL) and 4 M HCl in 1,4-dioxane (200 μL). After stirring the mixture at room temperature for 18 h, the solvent was removed and the residue chromatographed on silica gel using 2% EtOAc/DCM to give **8**: 110 mg (0.32 mmol, 87%); <sup>1</sup>H NMR (CDCl<sub>3</sub>, 400 MHz) δ 7.89 (m, 1H), 7.78 (m, 1H), 7.54 (m, 3H), 7.42 (m, 3H), 7.14 (d,  $J = 8.4$  Hz, 1H), 6.49 (t,  $J = 72$  Hz, 1H), 4.13 (s, 2H); TOF MS ES<sup>+</sup>  $m/z$  336.2 [M+H]<sup>+</sup>, 377.1 [M+ACN+H]<sup>+</sup>; HPLC Method A,  $t_R = 3.41$  min.

**Table S1:** Radioligand HPLC purification conditions.

| <b>Radioligand</b>                                                 | <b>Column<sup>a</sup></b> | <b>Mobile phase (v/v)</b>                               | <b><i>t</i><sub>R</sub><br/>(min)<sup>b</sup></b> |
|--------------------------------------------------------------------|---------------------------|---------------------------------------------------------|---------------------------------------------------|
| [ <sup>11</sup> C] <b>3</b> ([ <sup>11</sup> C]T1953)              | Luna C18(2), 10 μm        | MeCN-H <sub>2</sub> O (62/38)                           | 9.4                                               |
| [ <sup>11</sup> C] <b>4</b> ([ <sup>11</sup> C]T2525)              | Luna C18(2), 10 μm        | MeCN-0.1 M aq. HCO <sub>2</sub> NH <sub>4</sub> (55/45) | 11.8                                              |
| [ <sup>11</sup> C] <b>5</b> ([ <sup>11</sup> C]T1660)              | Luna C18(2), 10 μm        | MeCN-H <sub>2</sub> O (60/40)                           | 8.0                                               |
| [ <sup>11</sup> C] <b>6</b> ([ <sup>11</sup> C]T1650)              | Luna C18, 10 μm           | MeCN-0.1 M aq. HCO <sub>2</sub> NH <sub>4</sub> (45/55) | 9.9                                               |
| [ <sup>11</sup> C] <b>6</b> ([ <sup>11</sup> C]T1650) <sup>c</sup> | Luna C18, 5 μm            | MeCN-0.1 M aq. HCO <sub>2</sub> NH <sub>4</sub> (45/55) | 10.6                                              |

<sup>a</sup> All HPLC columns had dimensions of 10 mm o.d. × 250 mm and were eluted at 6 mL/min.

<sup>b</sup> Carrier for each radioligand elutes slightly earlier because UV absorbance and radioactivity detectors are in series.

<sup>c</sup> For human productions.

**Table S2:** Radioligand HPLC analysis conditions.

| <b>Radioligand</b>                                    | <b>Column<sup>a</sup></b> | <b>Mobile phase (v/v)</b>                               | <b><i>t</i><sub>R</sub><br/>(min)<sup>b</sup></b> |
|-------------------------------------------------------|---------------------------|---------------------------------------------------------|---------------------------------------------------|
| [ <sup>11</sup> C] <b>3</b> ([ <sup>11</sup> C]T1953) | Luna C18, 10 μm           | MeCN-H <sub>2</sub> O (60/40)                           | 7.9                                               |
| [ <sup>11</sup> C] <b>4</b> ([ <sup>11</sup> C]T2525) | Luna C18, 10 μm           | MeCN-0.1 M aq. HCO <sub>2</sub> NH <sub>4</sub> (60/40) | 5.1                                               |
| [ <sup>11</sup> C] <b>5</b> ([ <sup>11</sup> C]T1660) | Luna C18, 10 μm           | MeCN-0.1 M aq. HCO <sub>2</sub> NH <sub>4</sub> (60/40) | 5.4                                               |
| [ <sup>11</sup> C] <b>6</b> ([ <sup>11</sup> C]T1650) | Luna C18(2), 10 μm        | MeCN-0.1 M aq. HCO <sub>2</sub> NH <sub>4</sub> (50/50) | 4.0                                               |

<sup>a</sup> All the HPLC columns had dimensions of 4.6 mm o.d. × 250 mm and were eluted at 2.0 mL/min.

<sup>b</sup> Carrier for each radioligand elutes slightly earlier because UV absorbance and radioactivity detectors are in series.

All the formulated radioligands were chemically and radiochemically stable for at least 1 h by radio-HPLC analysis.

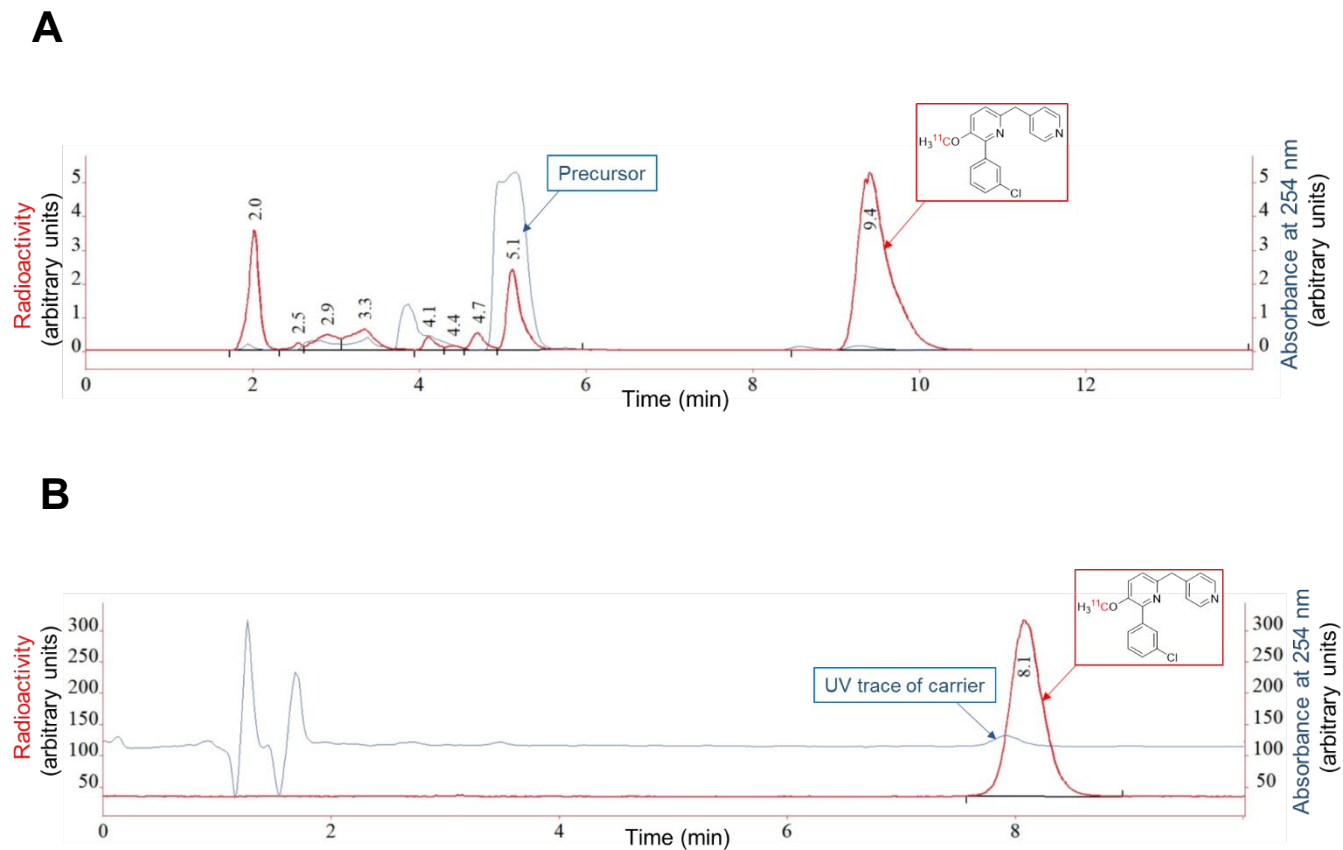

**Figure S2.**  $[^{11}\text{C}]3$  ( $[^{11}\text{C}]T1953$ ) HPLC chromatograms. **A:** Preparative HPLC chromatogram. **B:** Analytical HPLC chromatogram.

**A**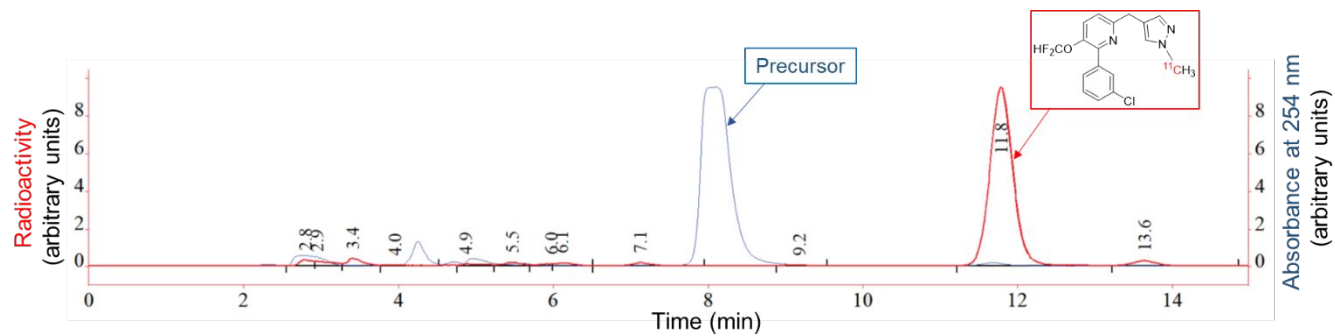**B**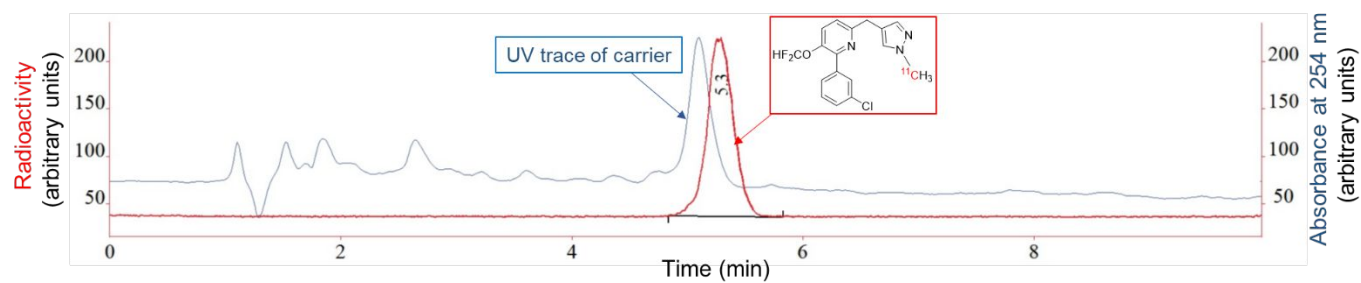

**Figure S3.** [ $^{11}\text{C}$ ]4 ([ $^{11}\text{C}$ ]T2525) HPLC Chromatograms. **A:** Preparative HPLC chromatogram. **B:** Analytical HPLC chromatogram.



**A**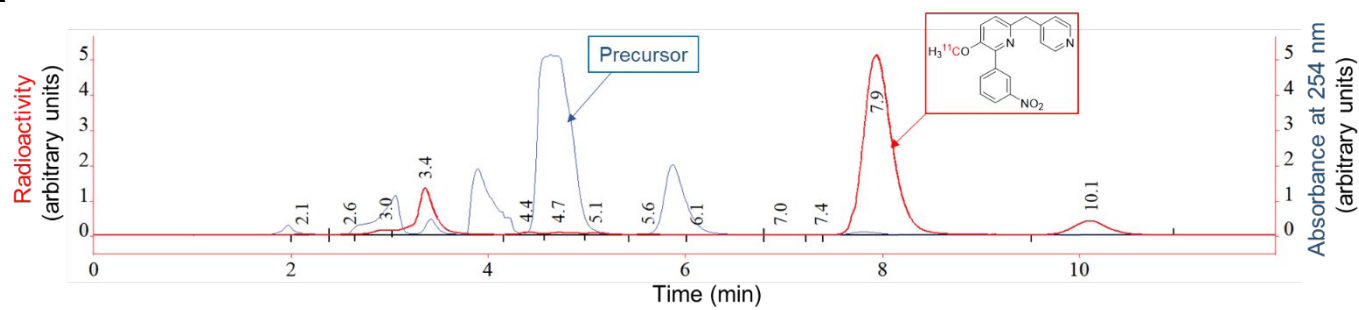**B**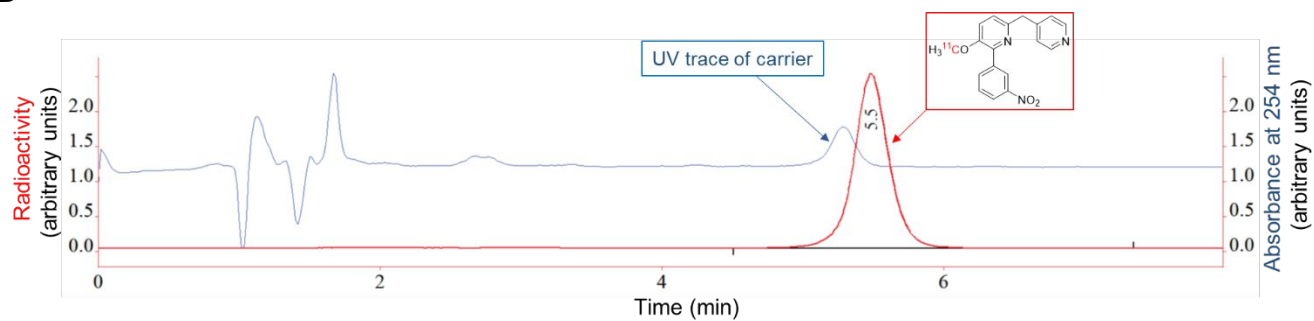

**Figure S4.**  $[^{11}\text{C}]\mathbf{5}$  ( $[^{11}\text{C}]\text{T1660}$ ) HPLC Chromatograms. **A:** Preparative HPLC chromatogram. **B:** Analytical HPLC chromatogram.

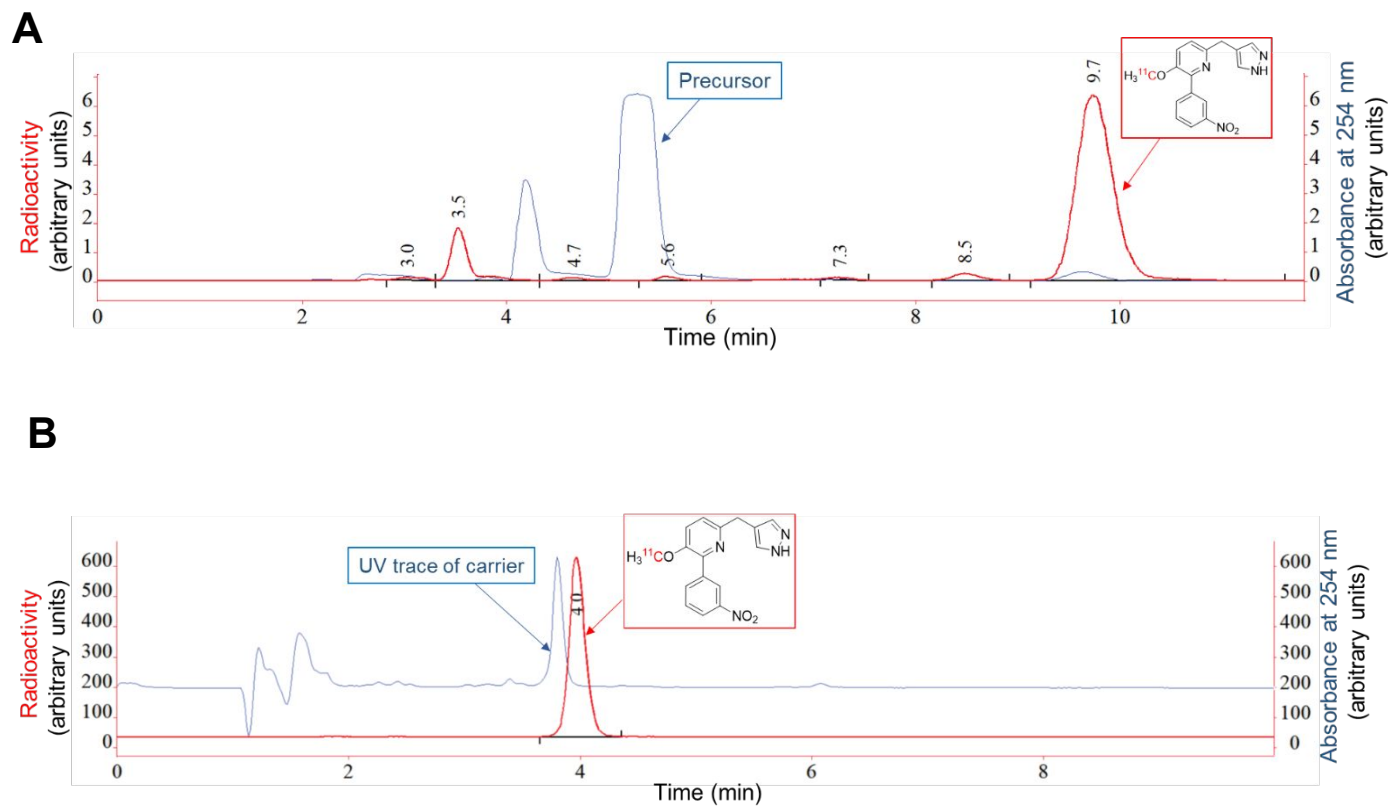

**Figure S5.**  $[^{11}\text{C}]6$  ( $[^{11}\text{C}]T1650$ ) HPLC Chromatograms: **A:** Preparative HPLC chromatogram. **B:** Analytical HPLC chromatogram.

**A**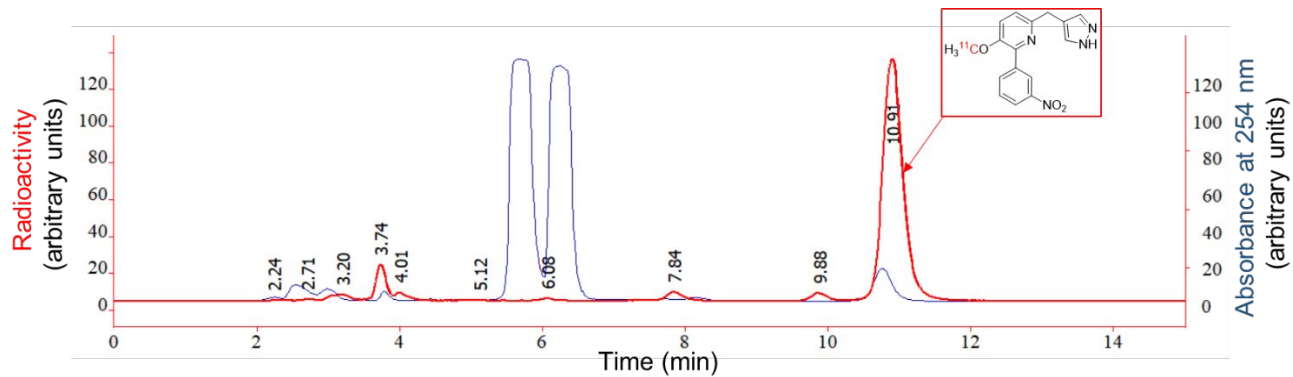**B**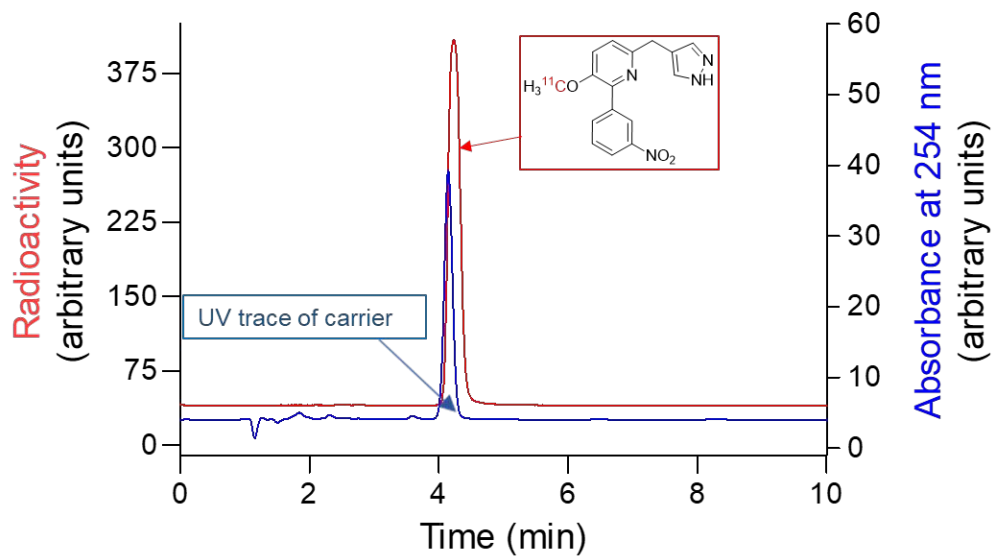

**Figure S6.** HPLC Chromatograms for  $[^{11}C]6$  ( $[^{11}C]T1650$ ) production in a CGMP laboratory. **A:** Preparative HPLC chromatogram. **B:** Analytical HPLC chromatogram.

**Table S3:** Yields and  $A_m$  values for PDE4D radioligands evaluated in monkey.

| <b>Radioligand</b>                                    | <b>Yield<sup>a</sup><br/>(%)</b> | <b><math>A_m</math><sup>b</sup><br/>(GBq/<math>\mu</math>mol at EOS)</b> |
|-------------------------------------------------------|----------------------------------|--------------------------------------------------------------------------|
| [ <sup>11</sup> C] <b>3</b> ([ <sup>11</sup> C]T1953) | 13 $\pm$ 2 ( $n$ = 4)            | 309 $\pm$ 90 ( $n$ = 4)                                                  |
| [ <sup>11</sup> C] <b>4</b> ([ <sup>11</sup> C]T2525) | 17 $\pm$ 4 ( $n$ = 7)            | 228 $\pm$ 31 ( $n$ = 7)                                                  |
| [ <sup>11</sup> C] <b>5</b> ([ <sup>11</sup> C]T1660) | 16 $\pm$ 5 ( $n$ = 5)            | 354 $\pm$ 93 ( $n$ = 3)                                                  |
| [ <sup>11</sup> C] <b>6</b> ([ <sup>11</sup> C]T1650) | 20 $\pm$ 6 ( $n$ = 7)            | 229 $\pm$ 91 ( $n$ = 6)                                                  |

<sup>a</sup> Estimated from starting cyclotron-produced [<sup>11</sup>C]carbon dioxide. Some productions were used only for logD measurements; all others were used for PET imaging.

<sup>b</sup> Measured only for those productions used for PET imaging.

For human PET experiments [<sup>11</sup>C]**6** ([<sup>11</sup>C]T1650) was obtained in yields of 6.5  $\pm$  2.5 GBq at end of synthesis (EOS) with molar activities of 265  $\pm$  137 GBq/ $\mu$ mol ( $n$  = 4) from the amount of cyclotron-produced [<sup>11</sup>C]carbon dioxide obtained from irradiation of the cyclotron target with a proton beam (16.5 MeV, 45  $\mu$ A) for 40 min.

**Table S4.** Measured lipophilicities (mlog $D_{7.4}$ ) and monkey and human plasma free fractions ( $f_p$ ) at baseline for tested radioligands.

| <b>Radioligand</b>                                    | <b>mLog<math>D_{7.4}</math><sup>a</sup><br/>(<math>n</math> = 6)</b> | <b>Plasma free fraction (<math>f_p</math>)</b> |                                          |
|-------------------------------------------------------|----------------------------------------------------------------------|------------------------------------------------|------------------------------------------|
|                                                       |                                                                      | <b>Monkey<sup>b</sup></b>                      | <b>Human control<br/>standard plasma</b> |
| [ <sup>11</sup> C] <b>3</b> ([ <sup>11</sup> C]T1953) | 3.45 $\pm$ 0.09                                                      | 0.0115 & 0.0160                                | 0.0077 & 0.0093                          |
| [ <sup>11</sup> C] <b>4</b> ([ <sup>11</sup> C]T2525) | 3.07 $\pm$ 0.24                                                      | 0.0144 & 0.0141                                | 0.0109 & 0.0102                          |
| [ <sup>11</sup> C] <b>5</b> ([ <sup>11</sup> C]T1660) | 3.38 $\pm$ 0.05                                                      | 0.0498 & 0.0779                                | 0.0271 & 0.0406                          |
| [ <sup>11</sup> C] <b>6</b> ([ <sup>11</sup> C]T1650) | 2.89 $\pm$ 0.03                                                      | 0.0666 $\pm$ 0.0067 <sup>c</sup>               | 0.0341 $\pm$ 0.0044 <sup>b</sup>         |

<sup>a</sup> Measured with a method based on partition of formulated radioligand between  $n$ -octanol and sodium phosphate buffer (0.15 M; pH 7.4), as described previously (1).

<sup>b</sup> Values for particular monkey PET experiments are given in the main text.

<sup>c</sup> The average SD from 6 separate studies

#### Notes:

- Plasma free fraction was simultaneously determined in the experimental monkey plasma and in human control standards.
  - Monkey plasma: Plasma was prepared by centrifugation of blood taken from the experimental monkey before its injection with the radioligand.
  - Human control standard: pooled human plasma that had been aliquoted into Eppendorf tubes and individually stored at  $-70$  °C.
- Plasma free fraction was measured by the addition of radiochemically pure radioligand (1.11 – 2.22 kBq) to 650  $\mu$ L of non-radioactive plasma. After mixing and incubation for 10 min at room temperature, the free fraction was determined by ultrafiltration (Centrifree; Millipore, Billerica, Massachusetts) as previously described (2).

3. In order to eliminate inter-monkey variability, we used the free fraction values as determined by using the frozen human plasma, to better highlight the differences between the free fractions of the various radioligands.

#### References

1. Zoghbi SS, Anderson KB, Jenko KJ, Luckenbaugh DA, Innis RB and Pike VW. On quantitative relationships between drug-like compound lipophilicity and plasma free fraction in monkey and human. *J Pharm Sci* 2012; *101*, 1028–1039.
2. Gandelman MS, Baldwin RM, Zoghbi SS, Zea-Ponce Y, Innis RB. Evaluation of ultrafiltration for the free-fraction determination of single photon emission computed tomography (SPECT) radiotracers:  $\beta$ -CIT, IBF, and iomazenil. *J Pharm Sci* 1994; *83*: 1014–1019.

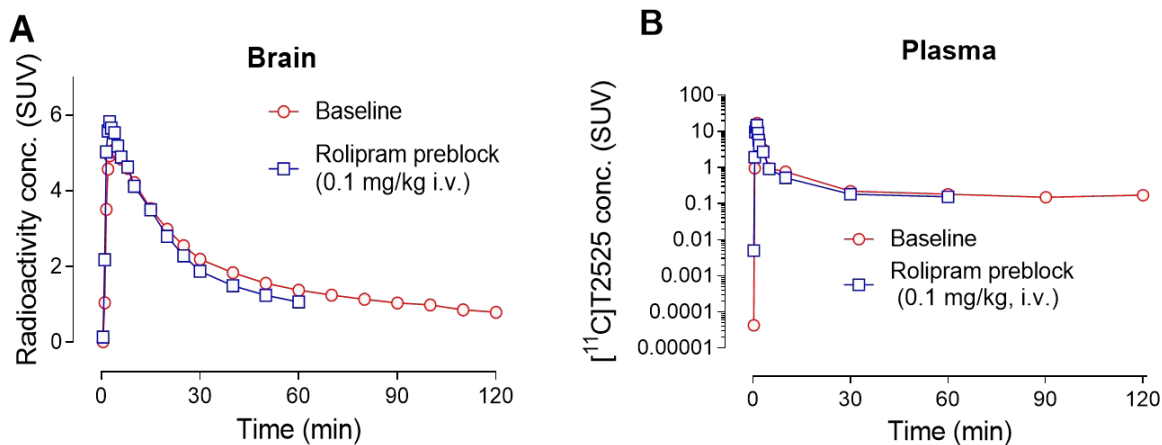

**Figure S7.** Data from PET experiments with [<sup>11</sup>C]4 ([<sup>11</sup>C]T2525) in monkey. Time-activity curves for whole brain at baseline and in a subsequent experiment in which rolipram (0.1 mg/kg) was administered intravenously at 5 min before [<sup>11</sup>C]4 to preblock PDE4D enzyme (**A**). Time course of unchanged [<sup>11</sup>C]4 in plasma during the baseline and rolipram preblock experiment (**B**). For these experiments, a single male monkey (13.9 kg) was injected intravenously with [<sup>11</sup>C]4 (321 MBq,  $A_m = 216$  GBq/ $\mu$ mol) at baseline and with [<sup>11</sup>C]4 (283 MBq,  $A_m = 275$  GBq/ $\mu$ mol) for the rolipram pre-block experiment.

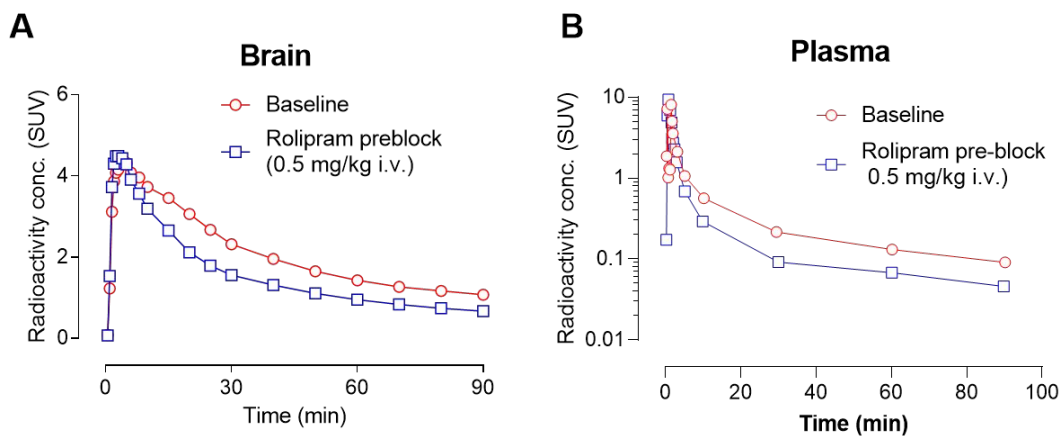

**Figure S8.** Data from PET experiments with [ $^{11}\text{C}$ ]3 ([ $^{11}\text{C}$ ]T1953) in monkey. Time-activity curves for whole brain at baseline and in a subsequent experiment in which rolipram (0.5 mg/kg) was administered intravenously at 5 minutes before [ $^{11}\text{C}$ ]3 to preblock PDE4D enzyme (**A**). Time course of unchanged [ $^{11}\text{C}$ ]T1953 in plasma during the baseline and rolipram pre-block experiment (**B**). For these experiments, a single male monkey (13.8 kg) was injected intravenously with [ $^{11}\text{C}$ ]3 (248 MBq;  $A_m = 185 \text{ GBq}/\mu\text{mol}$ ) at baseline and with [ $^{11}\text{C}$ ]3 (289 MBq,  $A_m = 162 \text{ GBq}/\mu\text{mol}$ ) for the rolipram pre-block experiment.

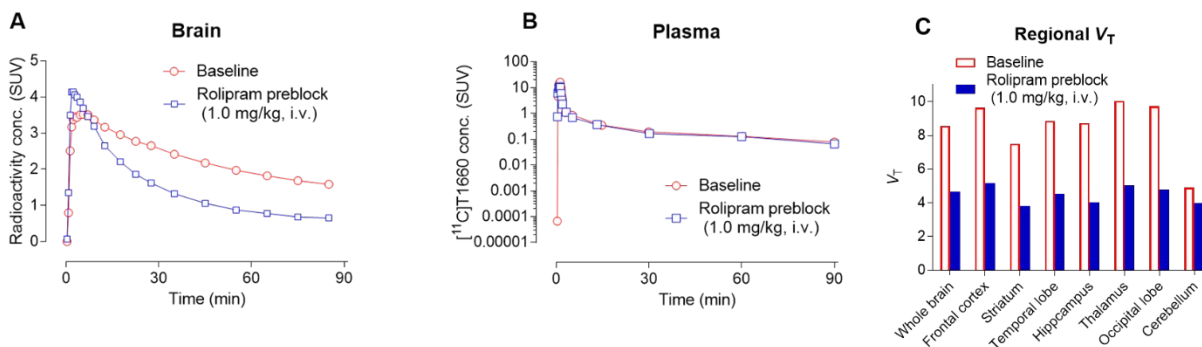

**Figure S9.** Data from PET experiments with [ $^{11}\text{C}$ ]5 ([ $^{11}\text{C}$ ]T1660) in monkey. Time-activity curves for whole brain at baseline and in a subsequent experiment in which rolipram (1.0 mg/kg) was administered intravenously at 5 minutes before [ $^{11}\text{C}$ ]5 to preblock PDE4D enzyme (A). Time course of unchanged [ $^{11}\text{C}$ ]5 in plasma during the baseline and rolipram preblock experiment (B). Brain regional  $V_T$  values at baseline and after rolipram preblock (C). For these experiments, a single male monkey (10.9 kg) was injected intravenously with [ $^{11}\text{C}$ ]5 (321 MBq,  $A_m = 216$  GBq/ $\mu\text{mol}$ ) at baseline and with [ $^{11}\text{C}$ ]5 (283 MBq,  $A_m = 275$  GBq/ $\mu\text{mol}$ ) for the rolipram pre-block experiment.

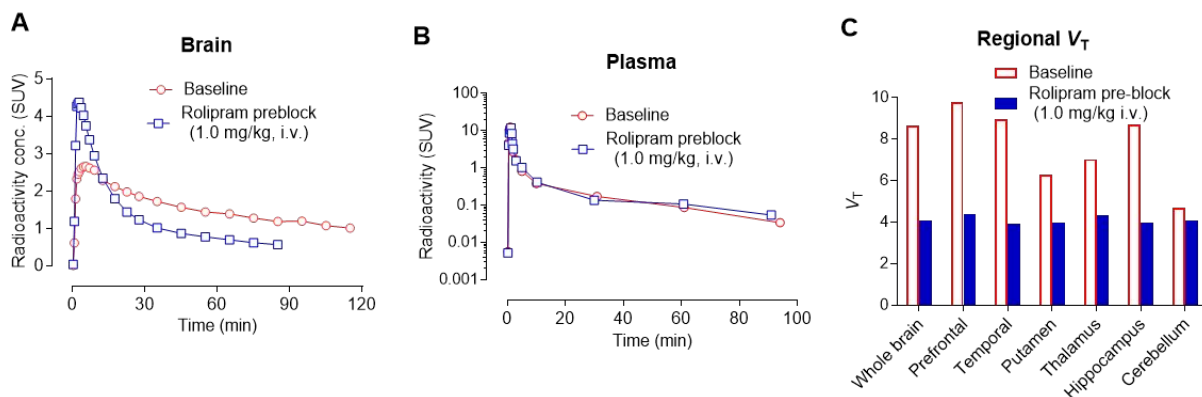

**Figure S10.** Data from PET experiments with [ $^{11}\text{C}$ ]6 ([ $^{11}\text{C}$ ]T1650) in monkey. Time-activity curves for whole brain at baseline and in a subsequent experiment in which rolipram (1.0 mg/kg) was administered intravenously at 5 minutes before [ $^{11}\text{C}$ ]6 to preblock PDE4D enzyme (A). Time course of unchanged [ $^{11}\text{C}$ ]6 in plasma during the baseline and rolipram preblock experiment (B). Brain regional  $V_T$  values at baseline and after rolipram preblock (C). For these experiments, a single male monkey (12.9 kg) was injected intravenously with [ $^{11}\text{C}$ ]6 (316 MBq,  $A_m = 65$  GBq/ $\mu\text{mol}$ ) at baseline and with [ $^{11}\text{C}$ ]6 (349 MBq,  $A_m = 108$  GBq/ $\mu\text{mol}$ ) for the rolipram pre-block experiment.



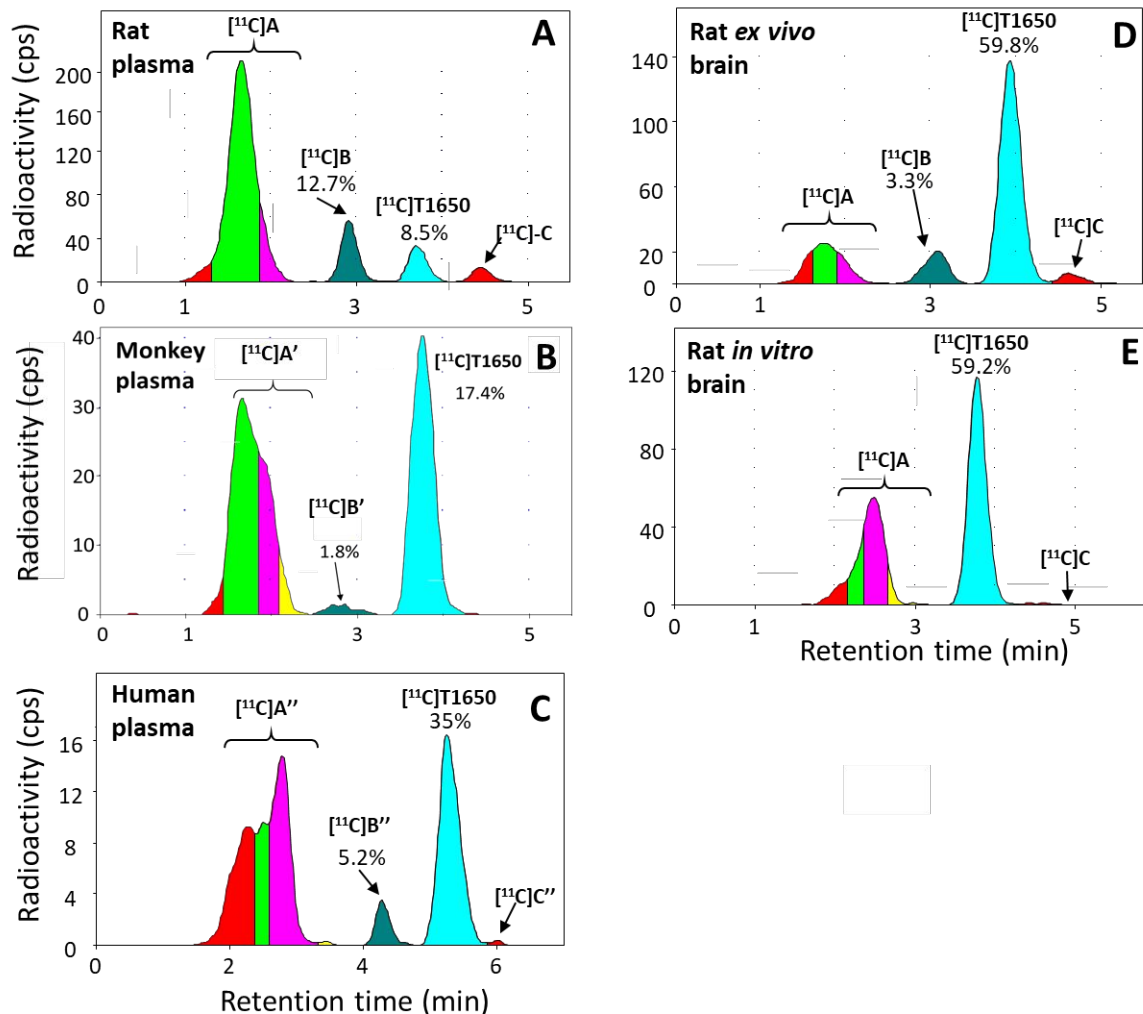

**Figure S11.** HPLC analyses of the radiometabolites of  $[^{11}\text{C}]\mathbf{6}$  ( $[^{11}\text{C}]\text{T1650}$ ) generated over 30 min in various tissues: plasma sampled during PET experiments in rat (A), monkey (B), and human (C), rat brain *ex vivo* (D), and fresh rat brain homogenate *in vitro* (E). Rat brain *in vitro* gave a similar radiometabolite profile to rat brain *ex vivo* but did not produce radiometabolite  $[^{11}\text{C}]\mathbf{B}$ . Rat brain radiometabolites therefore had both peripheral and central origin.  $[^{11}\text{C}]\mathbf{B}''$  was observed in human plasma. Radiometabolite profiles for rat, monkey, and human plasma, sampled during PET experiments, were quite similar.

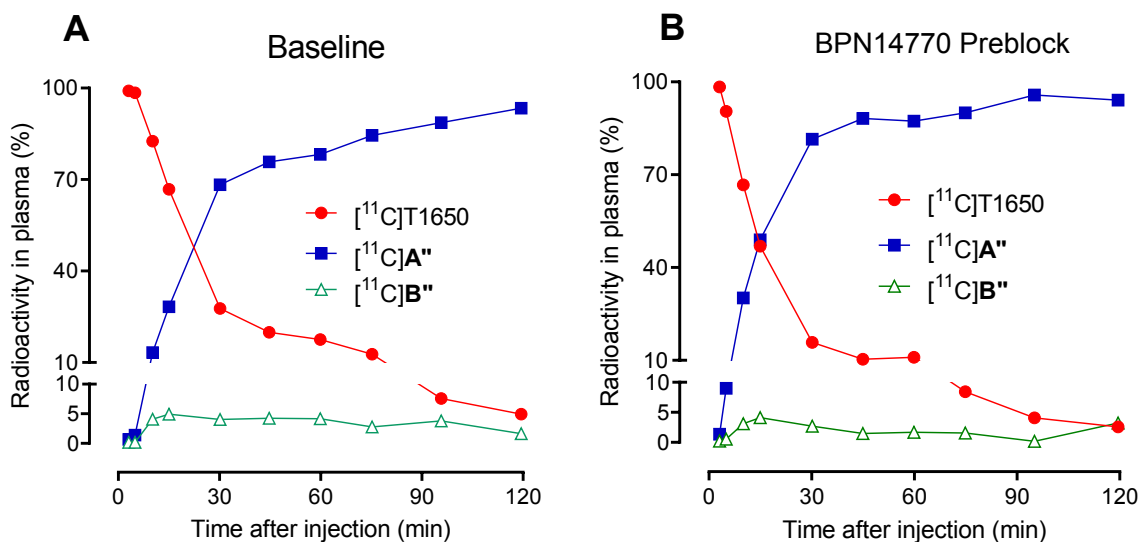

**Figure S12.** Time-courses for radioactive species in plasma of a single human subject following intravenous administration of [<sup>11</sup>C]6 ([<sup>11</sup>C]T1650) at baseline (A) and in a BPN14770 preblock experiment (B). Under each condition, [<sup>11</sup>C]6 declines quite rapidly, the group of polar radiometabolites [<sup>11</sup>C]A'', rise, and the lipophilic radiometabolite [<sup>11</sup>C]B'', which may penetrate the blood-brain barrier, stays relatively low and constant.

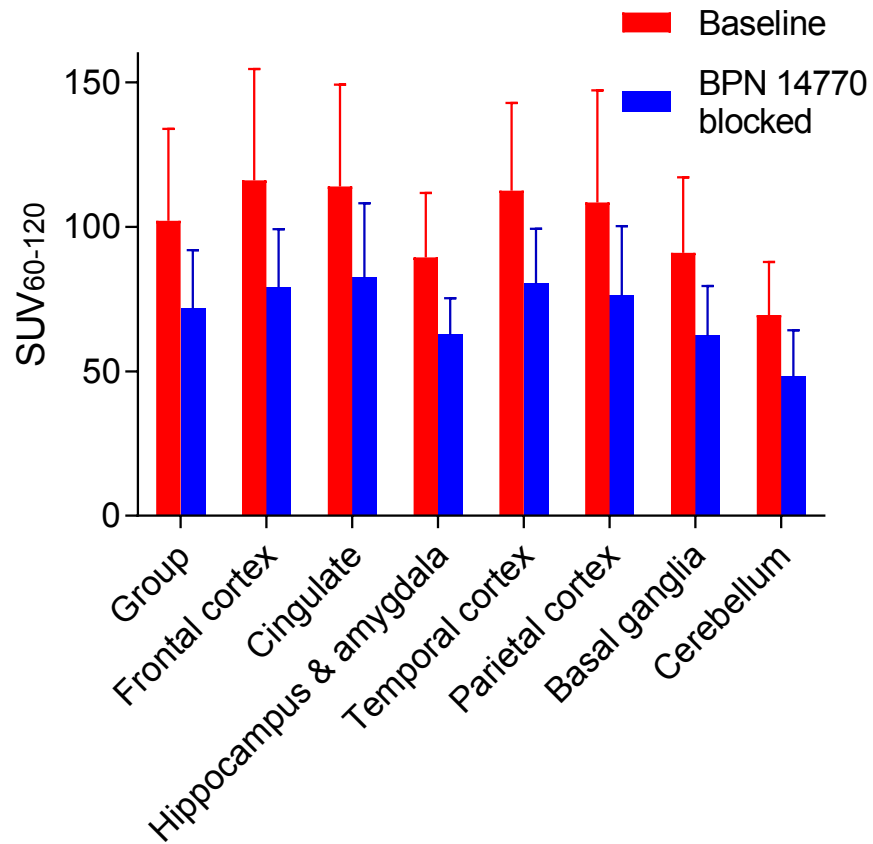

**Figure S13.** Average area ( $\pm$  range) of *AUC* for SUV from 60 to 120 minutes for two human participants. A significant difference ( $p < 0.05$ ) was observed between the baseline and BPN14770 blocked scan.

## Appendix 1. Characterization data for compounds 3–10.

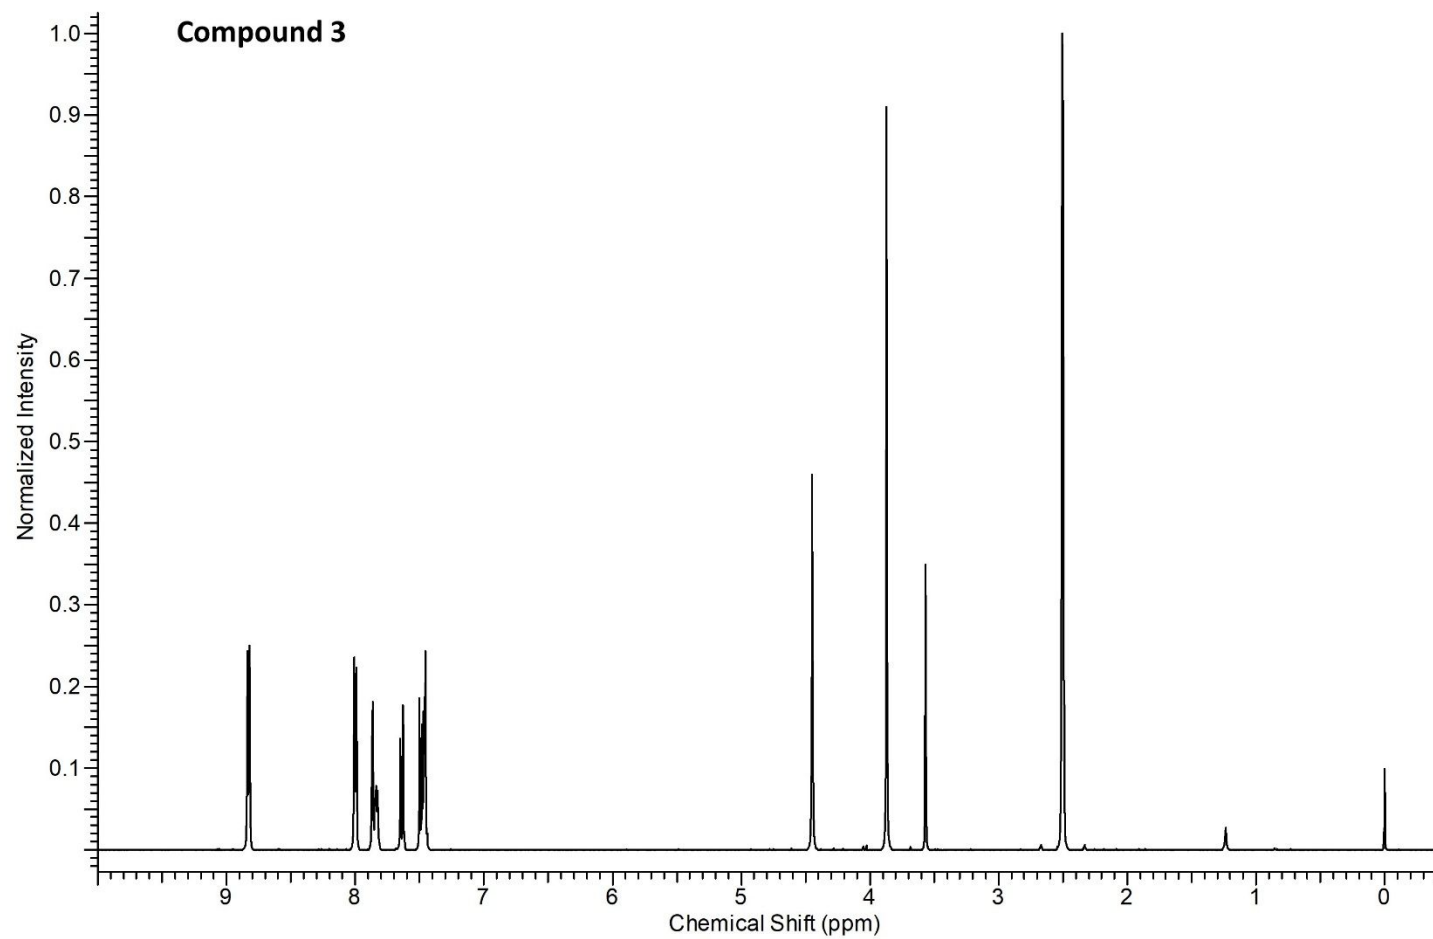

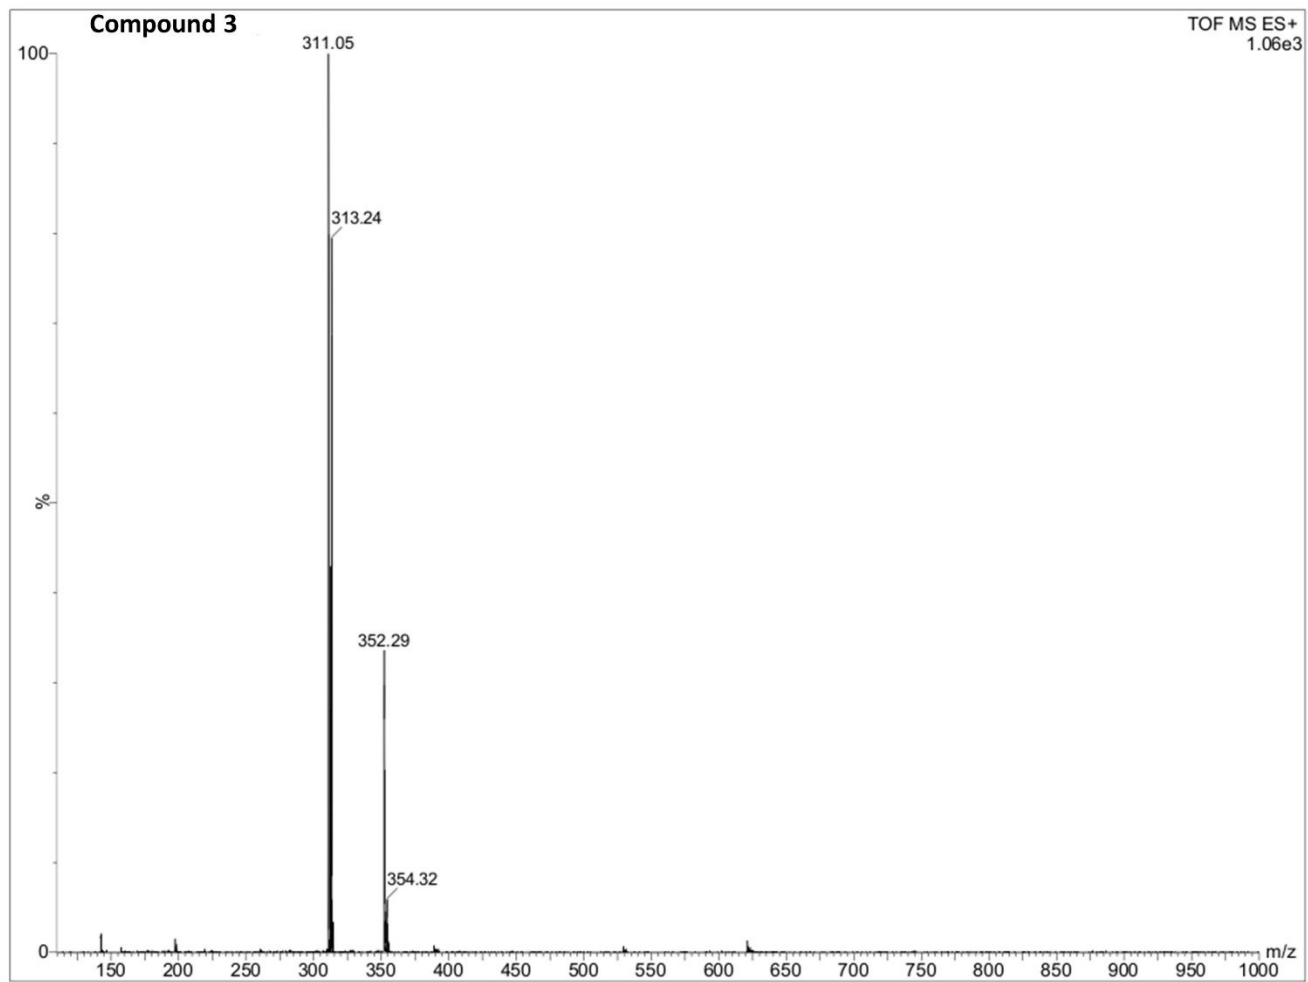

Sample Name: T-1953

```
=====
Acq. Operator   : Tetra Discovery Partners      Seq. Line :    1
Acq. Instrument : Instrument 1                 Location  : Vial 21
Injection Date  : 1/9/2020 8:32:43 AM         Inj       :    1
                                                Inj Volume: 5.0 µl
Sequence File   : C:\Users\Public\Documents\Agilent1100\STD_SEQ 2020-01-09 08-31-52\STD_SEQ.S
Method          : C:\USERS\PUBLIC\DOCUMENTS\AGILENT1100\STD_SEQ 2020-01-09 08-31-52\STD_MTD.M (
                  Sequence Method)
Last changed    : 10/17/2019 4:57:20 PM by Tetra Discovery Partners
Method Info     : Standard method for small molecule separation
=====
```

**Compound 3**

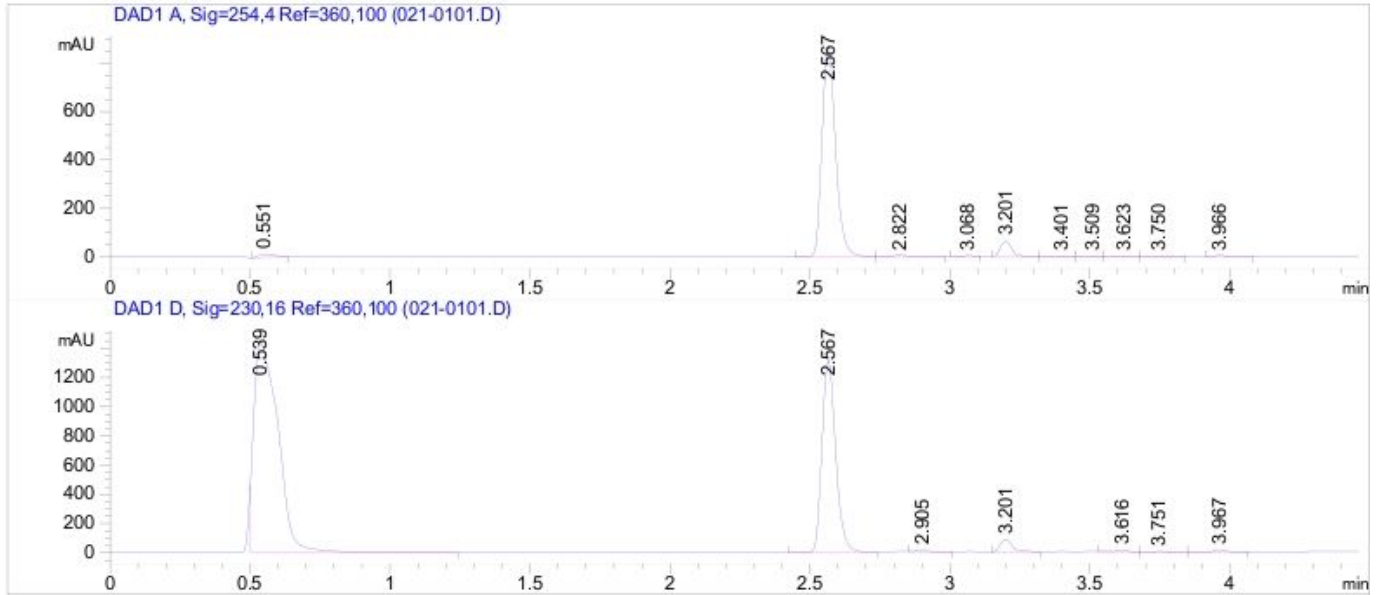

=====  
Area Percent Report  
=====

```
Sorted By      :      Signal
Multiplier:    :      1.0000
Dilution:      :      1.0000
Use Multiplier & Dilution Factor with ISTDs
```

Signal 1: DAD1 A, Sig=254,4 Ref=360,100

| Peak # | RetTime [min] | Type | Width [min] | Area [mAU*s] | Height [mAU] | Area %  |
|--------|---------------|------|-------------|--------------|--------------|---------|
| 1      | 0.551         | BB   | 0.0521      | 50.43425     | 13.96721     | 1.5751  |
| 2      | 2.567         | BB   | 0.0510      | 2915.57251   | 871.07605    | 91.0558 |
| 3      | 2.822         | BB   | 0.0836      | 22.17661     | 3.82966      | 0.6926  |
| 4      | 3.068         | BB   | 0.0418      | 6.63510      | 2.59704      | 0.2072  |
| 5      | 3.201         | BB   | 0.0442      | 170.79424    | 61.86639     | 5.3340  |
| 6      | 3.401         | BB   | 0.0454      | 5.10278      | 1.78195      | 0.1594  |
| 7      | 3.509         | BB   | 0.0378      | 5.30663      | 2.22504      | 0.1657  |
| 8      | 3.623         | BB   | 0.0508      | 8.71265      | 2.61982      | 0.2721  |
| 9      | 3.750         | BB   | 0.0617      | 5.94552      | 1.45314      | 0.1857  |
| 10     | 3.966         | BB   | 0.0493      | 11.28317     | 3.52795      | 0.3524  |

Sample Name: T-1953

=====

|                 |                                                                                                 |            |           |
|-----------------|-------------------------------------------------------------------------------------------------|------------|-----------|
| Acq. Operator   | : Tetra Discovery Partners                                                                      | Seq. Line  | : 1       |
| Acq. Instrument | : Instrument 1                                                                                  | Location   | : Vial 21 |
| Injection Date  | : 1/9/2020 8:32:43 AM                                                                           | Inj        | : 1       |
|                 |                                                                                                 | Inj Volume | : 5.0 µl  |
| Sequence File   | : C:\Users\Public\Documents\Agilent1100\STD_SEQ 2020-01-09 08-31-52\STD_SEQ.S                   |            |           |
| Method          | : C:\USERS\PUBLIC\DOCUMENTS\AGILENT1100\STD_SEQ 2020-01-09 08-31-52\STD_MTD.M (Sequence Method) |            |           |
| Last changed    | : 10/17/2019 4:57:20 PM by Tetra Discovery Partners                                             |            |           |
| Method Info     | : Standard method for small molecule separation                                                 |            |           |

=====

**Compound 3**

Totals : 3201.96345 964.94425

Signal 2: DAD1 D, Sig=230,16 Ref=360,100

| Peak # | RetTime [min] | Type | Width [min] | Area [mAU*s] | Height [mAU] | Area %  |
|--------|---------------|------|-------------|--------------|--------------|---------|
| 1      | 0.539         | BB   | 0.1015      | 8646.67383   | 1452.00574   | 64.4963 |
| 2      | 2.567         | BB   | 0.0515      | 4459.79590   | 1318.84167   | 33.2660 |
| 3      | 2.905         | BB   | 0.0395      | 12.81956     | 5.43780      | 0.0956  |
| 4      | 3.201         | BB   | 0.0457      | 242.38814    | 84.03511     | 1.8080  |
| 5      | 3.616         | BB   | 0.0512      | 16.99269     | 5.05645      | 0.1268  |
| 6      | 3.751         | BB   | 0.0648      | 5.77079      | 1.27546      | 0.0430  |
| 7      | 3.967         | BB   | 0.0491      | 22.01890     | 6.91523      | 0.1642  |

Totals : 1.34065e4 2873.56746

=====

\*\*\* End of Report \*\*\*

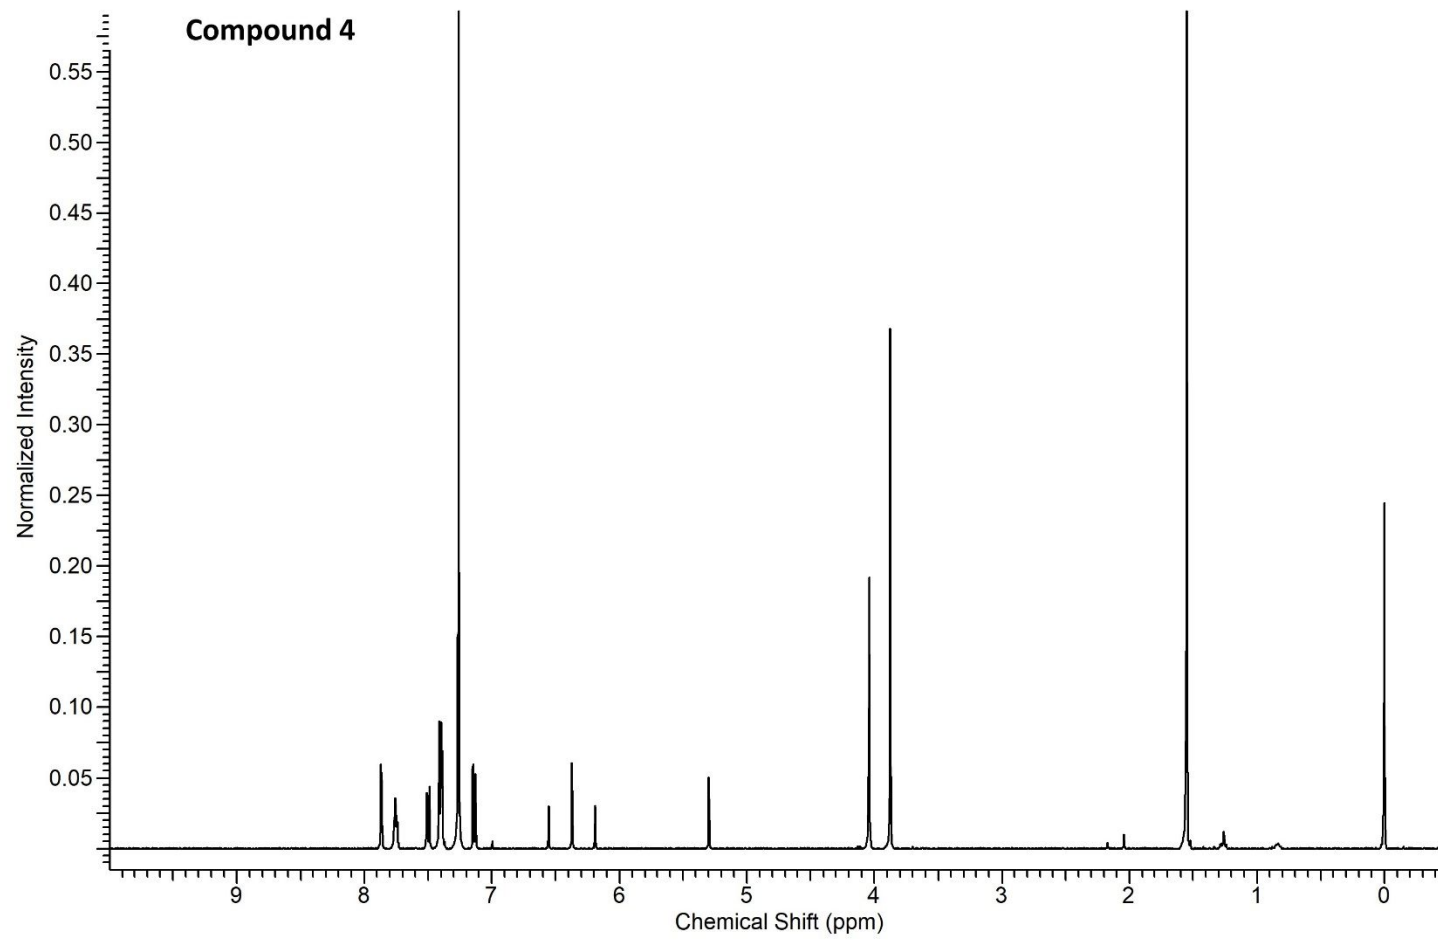



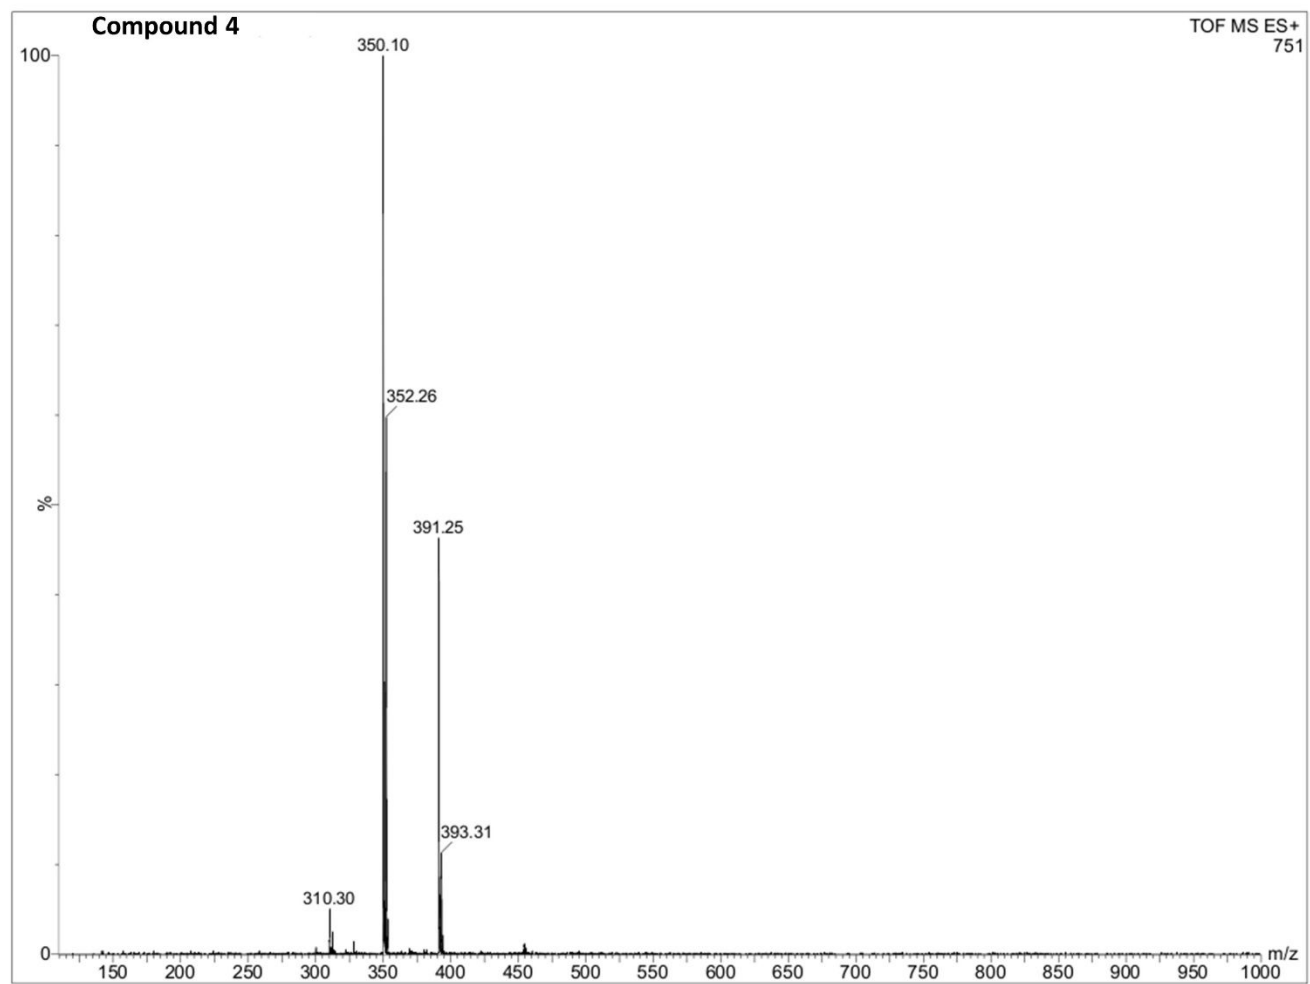

Sample Name: T-2525

=====

Acq. Operator : Tetra Discovery Partners      Seq. Line : 4  
 Acq. Instrument : Instrument 1                      Location : Vial 24  
 Injection Date : 1/9/2020 8:50:34 AM                      Inj : 1  
                                                                                                                                          Inj Volume : 5.0 µl

Sequence File : C:\Users\Public\Documents\Agilent1100\STD\_SEQ 2020-01-09 08-31-52\STD\_SEQ.S  
 Method : C:\USERS\PUBLIC\DOCUMENTS\AGILENT1100\STD\_SEQ 2020-01-09 08-31-52\STD\_MTD.M  
 (Sequence Method)

Last changed : 10/17/2019 4:57:20 PM by Tetra Discovery Partners  
 Method Info : Standard method for small molecule separation

=====

**Compound 4**

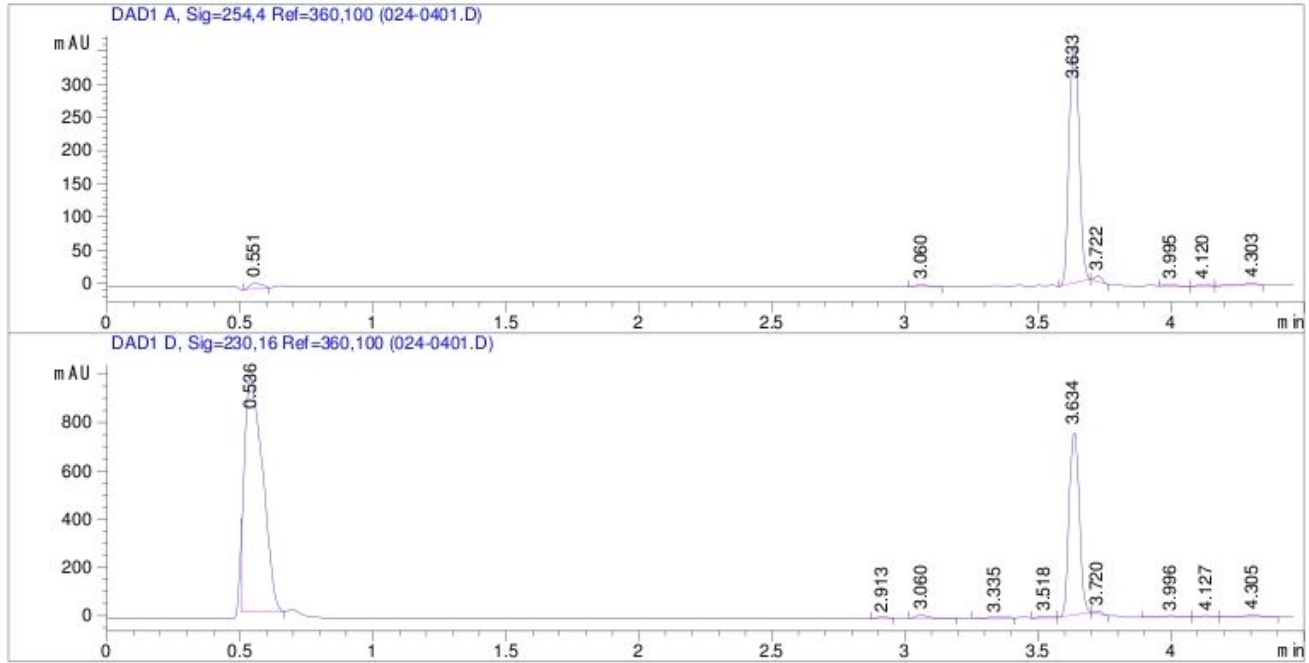

=====  
Area Percent Report  
=====

Sorted By : Signal  
 Multiplier: : 1.0000  
 Dilution: : 1.0000  
 Use Multiplier & Dilution Factor with ISTDs

Signal 1: DAD1 A, Sig=254,4 Ref=360,100

| Peak # | RetTime [min] | Type | Width [min] | Area [mAU*s] | Height [mAU] | Area %  |
|--------|---------------|------|-------------|--------------|--------------|---------|
| 1      | 0.551         | BB   | 0.0447      | 28.58870     | 9.07978      | 2.7681  |
| 2      | 3.060         | BB   | 0.0488      | 11.43199     | 3.62749      | 1.1069  |
| 3      | 3.633         | BB   | 0.0427      | 943.83051    | 359.08966    | 91.3854 |
| 4      | 3.722         | BB   | 0.0327      | 14.17191     | 7.29682      | 1.3722  |
| 5      | 3.995         | BB   | 0.0418      | 7.87900      | 3.08767      | 0.7629  |
| 6      | 4.120         | BB   | 0.0422      | 7.94757      | 3.07515      | 0.7695  |
| 7      | 4.303         | BB   | 0.0724      | 18.95312     | 3.66206      | 1.8351  |

Sample Name: T-2525

```
=====
Acq. Operator   : Tetra Discovery Partners      Seq. Line :    4
Acq. Instrument : Instrument 1                  Location  : Vial 24
Injection Date  : 1/9/2020 8:50:34 AM          Inj       :    1
                                                    Inj Volume: 5.0 µl
Sequence File   : C:\Users\Public\Documents\Agilent1100\STD_SEQ 2020-01-09 08-31-52\STD_SEQ.S
Method          : C:\USERS\PUBLIC\DOCUMENTS\AGILENT1100\STD_SEQ 2020-01-09 08-31-52\STD_MTD.M
                  (Sequence Method)
Last changed    : 10/17/2019 4:57:20 PM by Tetra Discovery Partners
Method Info     : Standard method for small molecule separation
=====
```

**Compound 4**

```
=====
Peak RetTime Type Width Area Height Area
# [min] [min] [mAU*s] [mAU] %
-----|-----|-----|-----|-----|-----|
Totals :                               1032.80279 388.91863
=====
```

Signal 2: DAD1 D, Sig=230,16 Ref=360,100

```
Peak RetTime Type Width Area Height Area
# [min] [min] [mAU*s] [mAU] %
-----|-----|-----|-----|-----|-----|
  1  0.536 BB  0.0806 4568.00830 976.36768 67.8306
  2  2.913 BB  0.0404  10.30285   4.22576  0.1530
  3  3.060 BB  0.0469  37.43121  12.50152  0.5558
  4  3.335 BB  0.0528   9.98064   2.72056  0.1482
  5  3.518 BB  0.0431   7.71517   2.89877  0.1146
  6  3.634 BB  0.0428 2017.14099 763.22974 29.9526
  7  3.720 BB  0.0315  15.51579   8.40579  0.2304
  8  3.996 BB  0.0582  19.94030   5.03152  0.2961
  9  4.127 BB  0.0438  11.70332   4.29360  0.1738
 10  4.305 BB  0.0592  36.70059   9.07931  0.5450
Totals :                               6734.43916 1788.75425
=====
```

\*\*\* End of Report \*\*\*

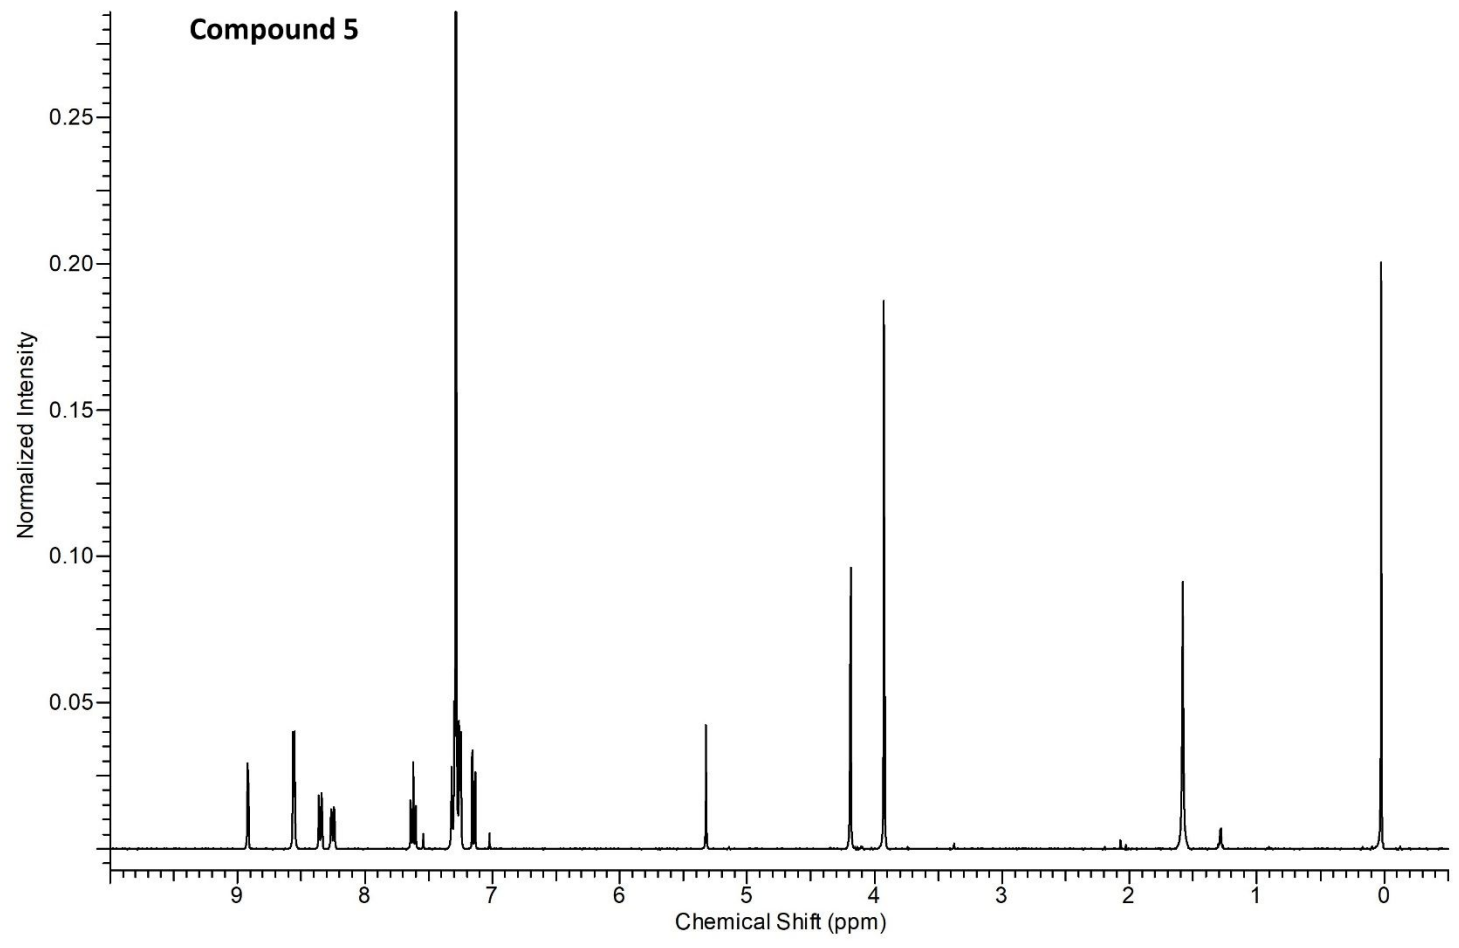

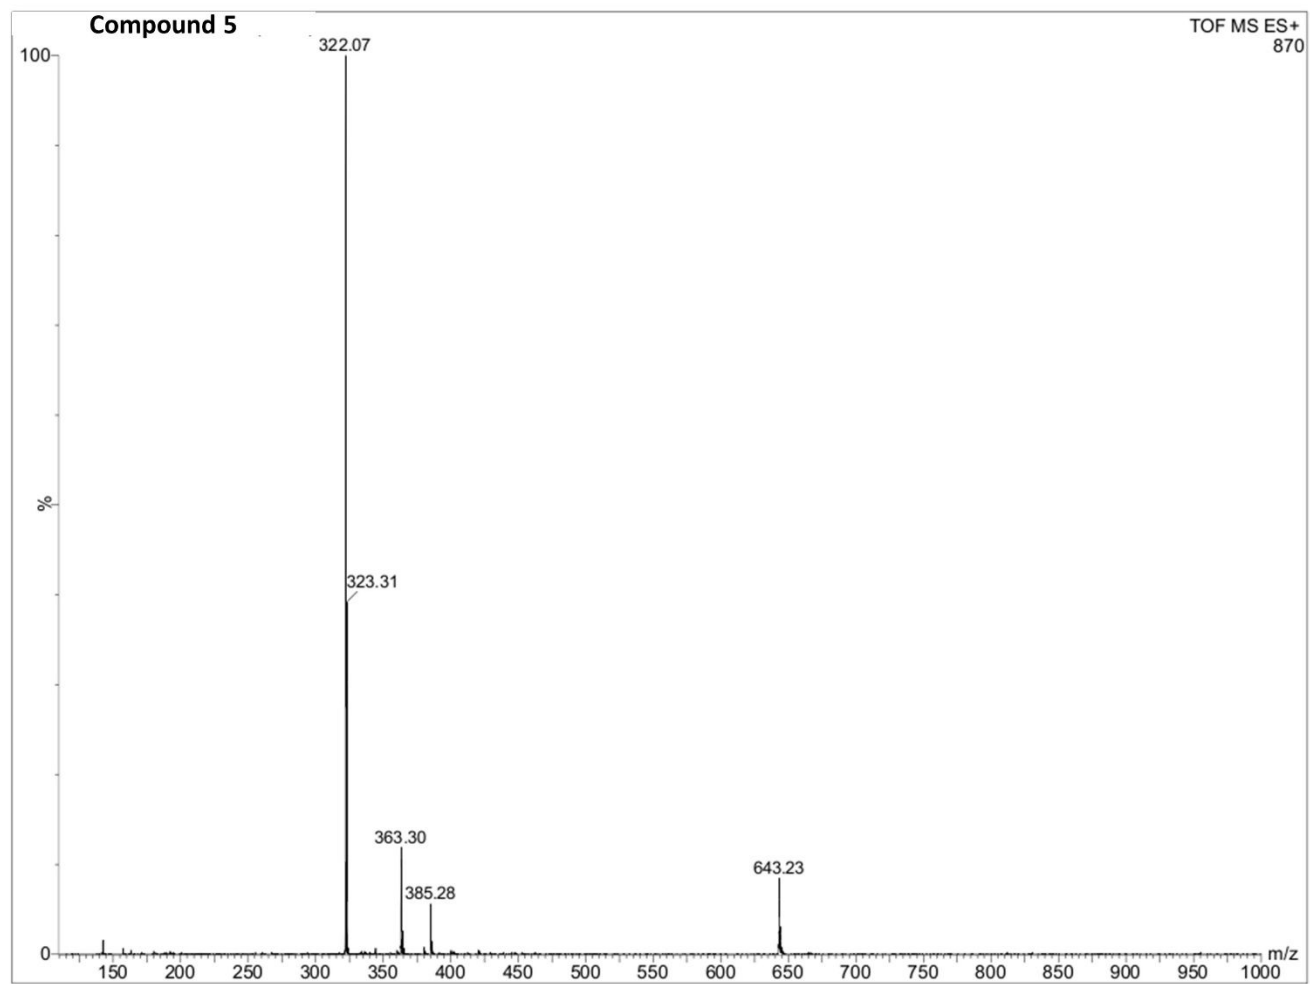

Sample Name: T-1660

```
=====
Acq. Operator   : Tetra Discovery Partners   Seq. Line :    3
Acq. Instrument : Instrument 1              Location  : Vial 23
Injection Date  : 1/9/2020 8:44:35 AM      Inj       :    1
                                           Inj Volume: 5.0 µl

Sequence File   : C:\Users\Public\Documents\Agilent1100\STD_SEQ 2020-01-09 08-31-52\STD_SEQ.S
Method          : C:\USERS\PUBLIC\DOCUMENTS\AGILENT1100\STD_SEQ 2020-01-09 08-31-52\STD_MTD.M
                  (Sequence Method)

Last changed    : 10/17/2019 4:57:20 PM by Tetra Discovery Partners
Method Info     : Standard method for small molecule separation
=====
```

## Compound 5

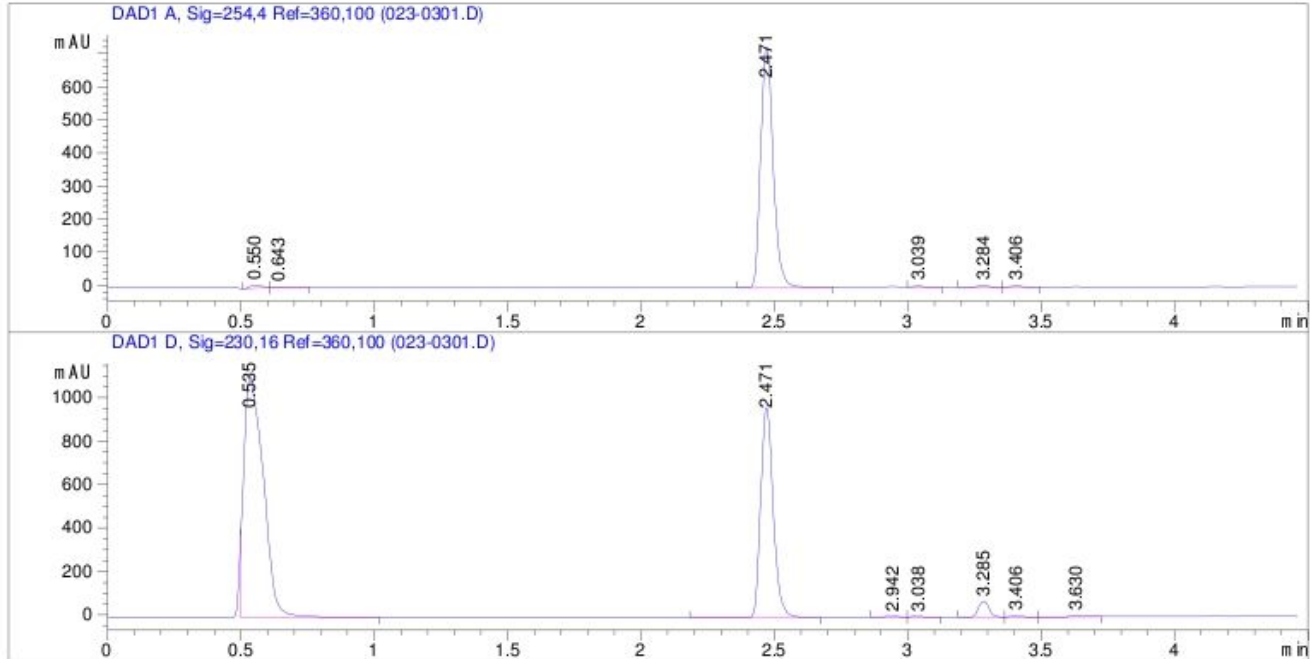

### Area Percent Report

```
Sorted By      : Signal
Multiplier:    : 1.0000
Dilution:      : 1.0000
Use Multiplier & Dilution Factor with ISTDs
```

Signal 1: DAD1 A, Sig=254,4 Ref=360,100

| Peak # | RetTime [min] | Type | Width [min] | Area [mAU*s] | Height [mAU] | Area %  |
|--------|---------------|------|-------------|--------------|--------------|---------|
| 1      | 0.550         | BB   | 0.0451      | 29.94461     | 9.40484      | 1.2259  |
| 2      | 0.643         | BB   | 0.0432      | 7.40898      | 2.45612      | 0.3033  |
| 3      | 2.471         | BB   | 0.0497      | 2367.99854   | 733.60571    | 96.9457 |
| 4      | 3.039         | BB   | 0.0443      | 7.79230      | 2.81743      | 0.3190  |
| 5      | 3.284         | BB   | 0.0501      | 15.08457     | 4.62256      | 0.6176  |
| 6      | 3.406         | BB   | 0.0458      | 14.37478     | 4.95661      | 0.5885  |

Sample Name: T-1660

```
=====
Acq. Operator   : Tetra Discovery Partners      Seq. Line :    3
Acq. Instrument : Instrument 1                 Location  : Vial 23
Injection Date  : 1/9/2020 8:44:35 AM          Inj       :    1
                                                Inj Volume: 5.0 µl
Sequence File   : C:\Users\Public\Documents\Agilent1100\STD_SEQ 2020-01-09 08-31-52\STD_SEQ.S
Method          : C:\USERS\PUBLIC\DOCUMENTS\AGILENT1100\STD_SEQ 2020-01-09 08-31-52\STD_MTD.M
                  (Sequence Method)
Last changed    : 10/17/2019 4:57:20 PM by Tetra Discovery Partners
Method Info     : Standard method for small molecule separation
=====
```

**Compound 5**

```
Totals :                2442.60379  757.86327
```

Signal 2: DAD1 D, Sig=230,16 Ref=360,100

| Peak # | RetTime [min] | Type | Width [min] | Area [mAU*s] | Height [mAU] | Area %  |
|--------|---------------|------|-------------|--------------|--------------|---------|
| 1      | 0.535         | BB   | 0.0724      | 5576.53760   | 1114.38977   | 62.1930 |
| 2      | 2.471         | BB   | 0.0497      | 3153.35059   | 975.58374    | 35.1681 |
| 3      | 2.942         | BB   | 0.0628      | 9.83256      | 2.45083      | 0.1097  |
| 4      | 3.038         | BB   | 0.0420      | 7.50536      | 2.92268      | 0.0837  |
| 5      | 3.285         | BB   | 0.0435      | 196.45462    | 72.80782     | 2.1910  |
| 6      | 3.406         | BB   | 0.0436      | 9.71770      | 3.58381      | 0.1084  |
| 7      | 3.630         | BB   | 0.0529      | 13.10033     | 3.73795      | 0.1461  |

```
Totals :                8966.49877  2175.47659
```

```
=====
*** End of Report ***
```

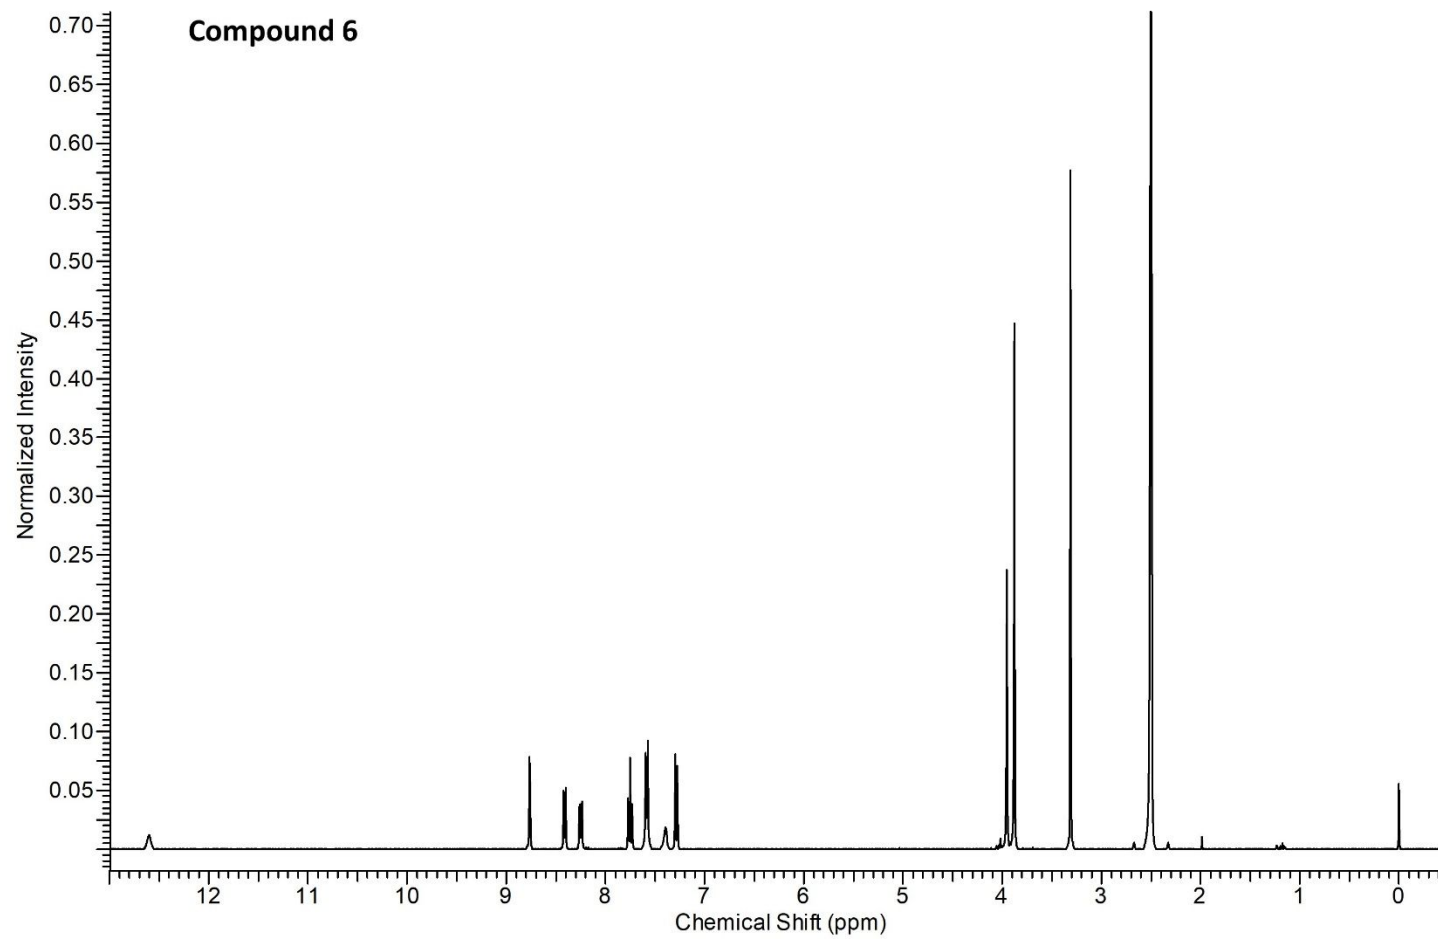



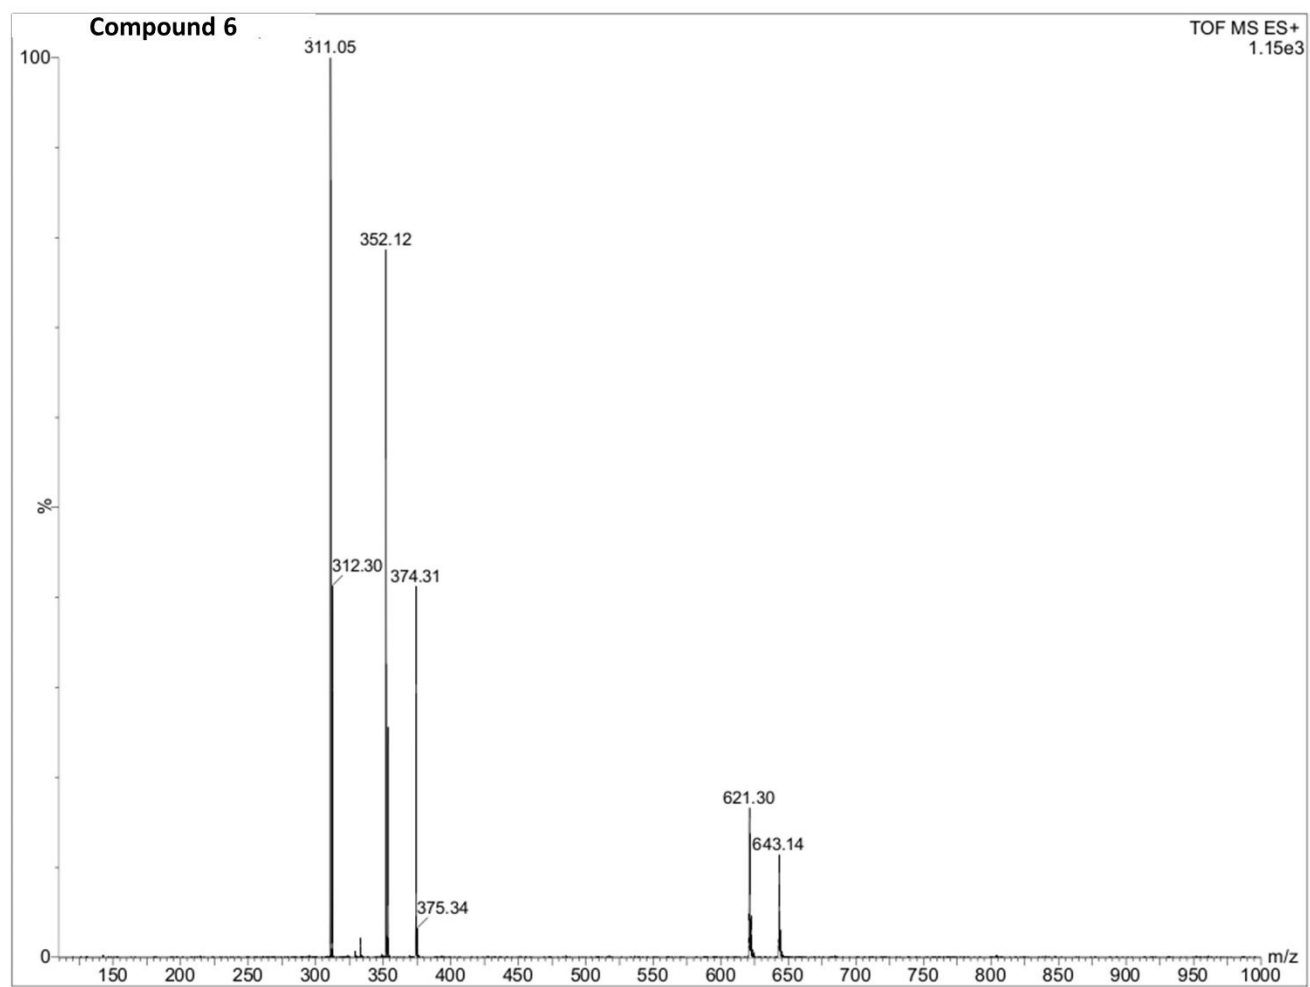

Sample Name: T-1650

=====

|                 |                                                                                                 |            |           |
|-----------------|-------------------------------------------------------------------------------------------------|------------|-----------|
| Acq. Operator   | : Tetra Discovery Partners                                                                      | Seq. Line  | : 2       |
| Acq. Instrument | : Instrument 1                                                                                  | Location   | : Vial 22 |
| Injection Date  | : 1/9/2020 8:38:40 AM                                                                           | Inj        | : 1       |
|                 |                                                                                                 | Inj Volume | : 5.0 µl  |
| Sequence File   | : C:\Users\Public\Documents\Agilent1100\STD_SEQ 2020-01-09 08-31-52\STD_SEQ.S                   |            |           |
| Method          | : C:\USERS\PUBLIC\DOCUMENTS\AGILENT1100\STD_SEQ 2020-01-09 08-31-52\STD_MTD.M (Sequence Method) |            |           |
| Last changed    | : 10/17/2019 4:57:20 PM by Tetra Discovery Partners                                             |            |           |
| Method Info     | : Standard method for small molecule separation                                                 |            |           |

=====

**Compound 6**

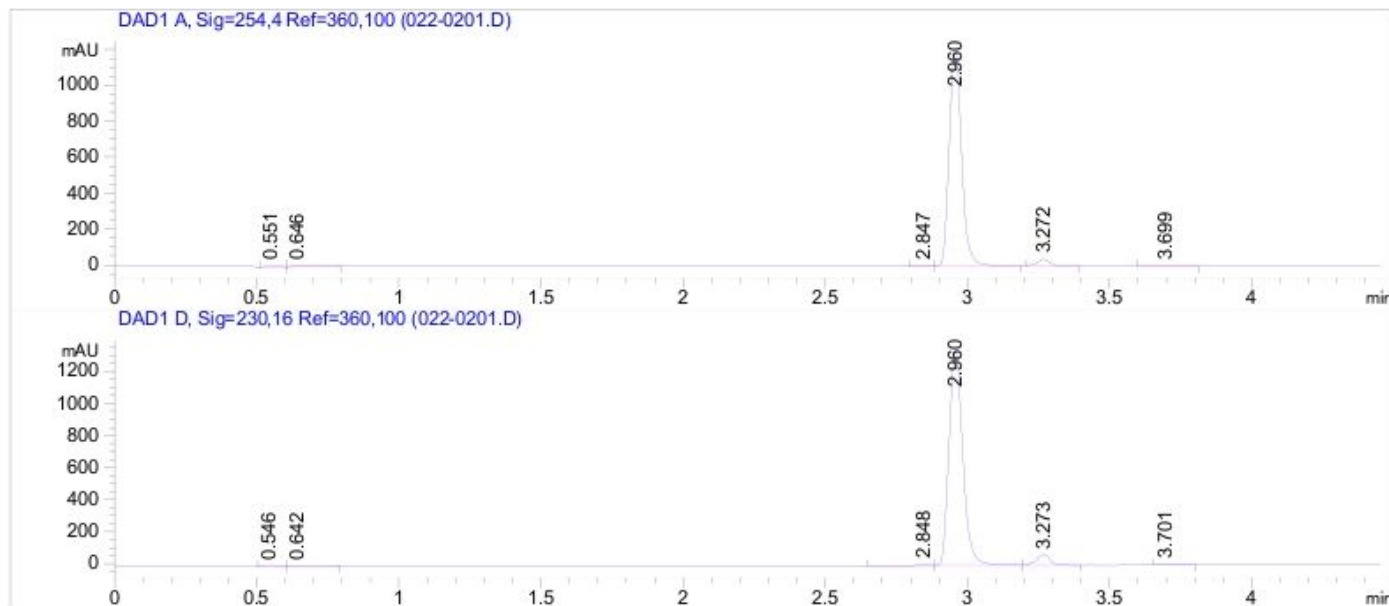

=====  
Area Percent Report  
=====

Sorted By : Signal  
Multiplier: : 1.0000  
Dilution: : 1.0000  
Use Multiplier & Dilution Factor with ISTDs

Signal 1: DAD1 A, Sig=254,4 Ref=360,100

| Peak # | RetTime [min] | Type | Width [min] | Area [mAU*s] | Height [mAU] | Area %  |
|--------|---------------|------|-------------|--------------|--------------|---------|
| 1      | 0.551         | BB   | 0.0438      | 21.60491     | 7.03463      | 0.5663  |
| 2      | 0.646         | BB   | 0.0603      | 17.42271     | 4.04187      | 0.4567  |
| 3      | 2.847         | BB   | 0.0391      | 8.06321      | 3.46912      | 0.2114  |
| 4      | 2.960         | BB   | 0.0472      | 3639.00562   | 1206.51001   | 95.3859 |
| 5      | 3.272         | BB   | 0.0499      | 117.67042    | 36.27000     | 3.0844  |
| 6      | 3.699         | BB   | 0.0531      | 11.26743     | 3.36524      | 0.2953  |

Totals : 3815.03429 1260.69087

Sample Name: T-1650

```
=====
Acq. Operator   : Tetra Discovery Partners      Seq. Line :    2
Acq. Instrument : Instrument 1                 Location  : Vial 22
Injection Date  : 1/9/2020 8:38:40 AM          Inj       :    1
                                                Inj Volume: 5.0 µl
Sequence File   : C:\Users\Public\Documents\Agilent1100\STD_SEQ 2020-01-09 08-31-52\STD_SEQ.S
Method          : C:\USERS\PUBLIC\DOCUMENTS\AGILENT1100\STD_SEQ 2020-01-09 08-31-52\STD_MTD.M (
                  Sequence Method)
Last changed    : 10/17/2019 4:57:20 PM by Tetra Discovery Partners
Method Info     : Standard method for small molecule separation
=====
```

**Compound 6**

Signal 2: DAD1 D, Sig=230,16 Ref=360,100

| Peak # | RetTime [min] | Type | Width [min] | Area [mAU*s] | Height [mAU] | Area %  |
|--------|---------------|------|-------------|--------------|--------------|---------|
| 1      | 0.546         | BB   | 0.0411      | 27.30640     | 9.06798      | 0.5705  |
| 2      | 0.642         | BB   | 0.0512      | 20.85920     | 5.63690      | 0.4358  |
| 3      | 2.848         | BB   | 0.0300      | 9.02666      | 5.84961      | 0.1886  |
| 4      | 2.960         | BB   | 0.0530      | 4497.88916   | 1343.84485   | 93.9666 |
| 5      | 3.273         | BB   | 0.0499      | 215.06854    | 66.22860     | 4.4931  |
| 6      | 3.701         | BB   | 0.0456      | 16.53905     | 5.73654      | 0.3455  |

Totals : 4786.68901 1436.36447

\*\*\* End of Report \*\*\*

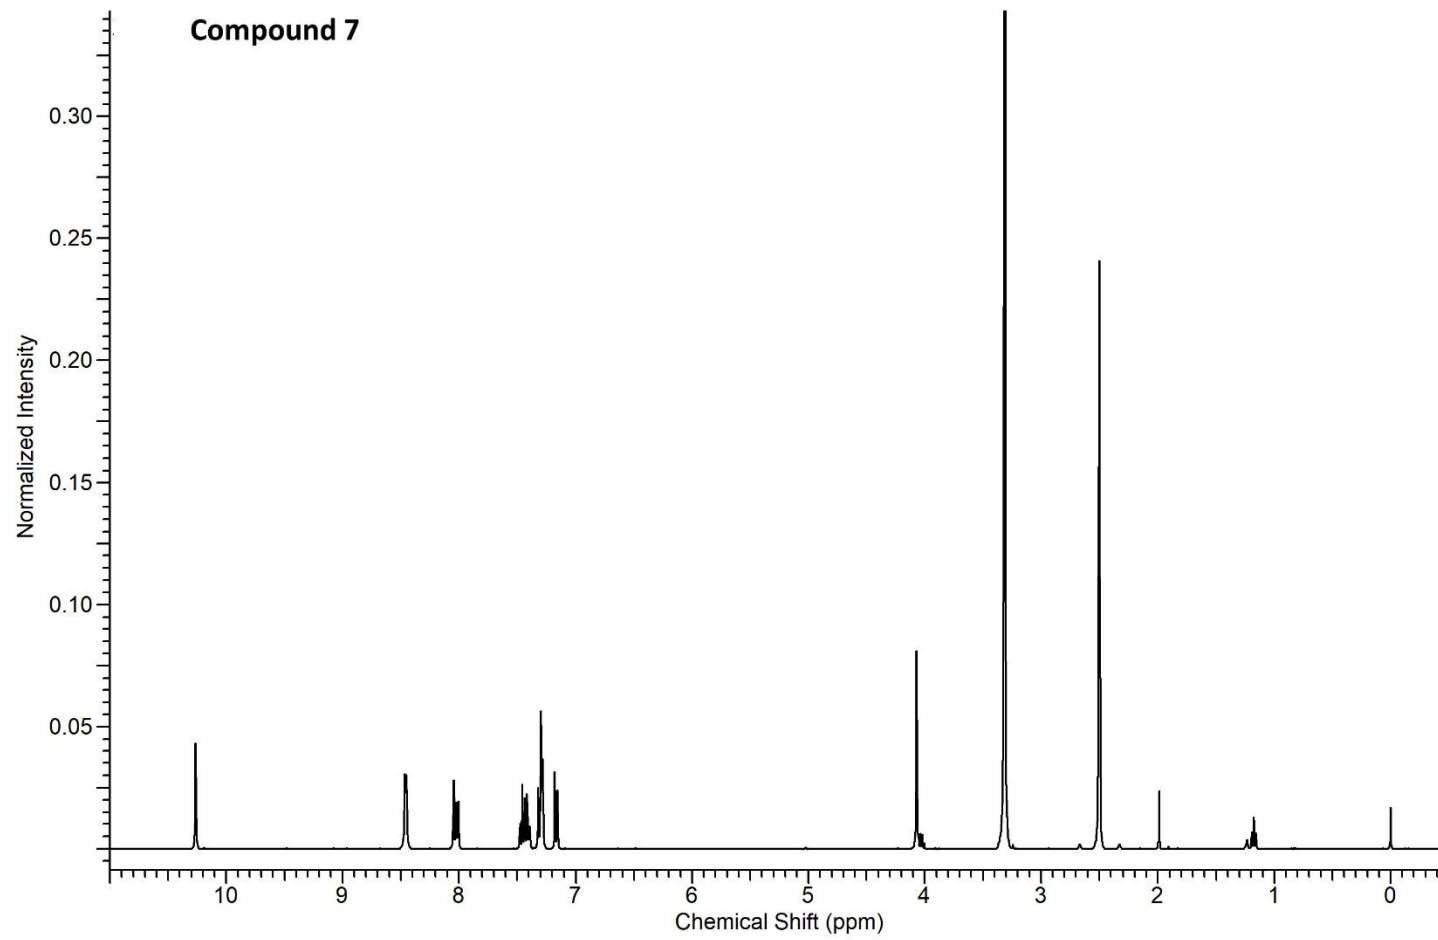

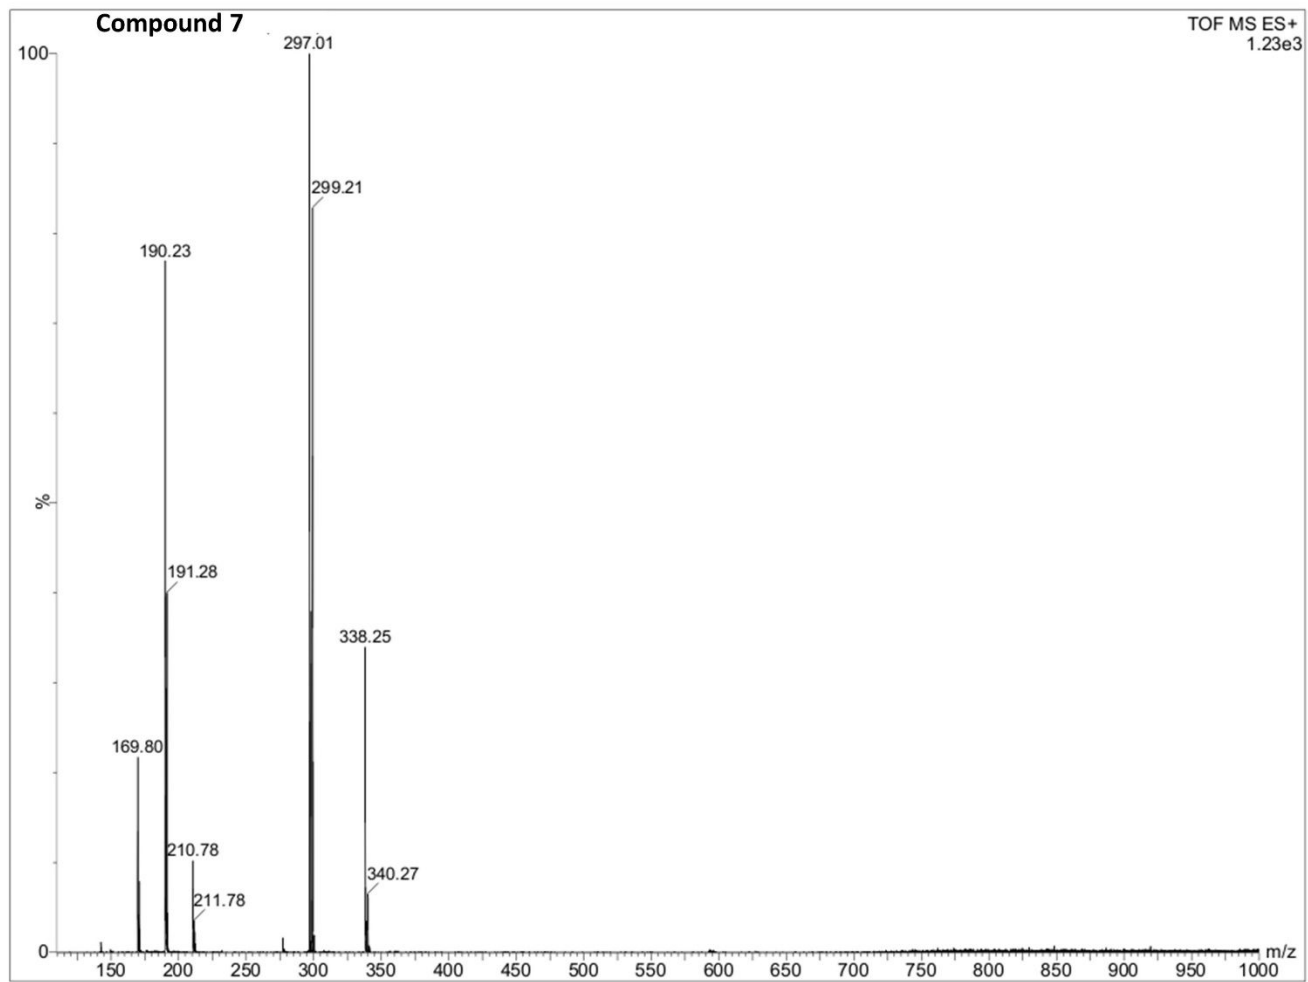

Sample Name: T-2009

```
=====
Acq. Operator   : Tetra Discovery Partners      Seq. Line :    2
Acq. Instrument : Instrument 1                 Location  : Vial 2
Injection Date  : 1/13/2020 5:09:16 PM        Inj       :    1
                                                Inj Volume: 5.0 µl
Sequence File   : C:\Users\Public\Documents\Agilent1100\STD_SEQ 2020-01-13 17-01-50\STD_SEQ.S
Method          : C:\USERS\PUBLIC\DOCUMENTS\AGILENT1100\STD_SEQ 2020-01-13 17-01-50\STD_MTD.M (
                  Sequence Method)
Last changed    : 10/17/2019 4:57:20 PM by Tetra Discovery Partners
Method Info     : Standard method for small molecule separation
=====
```

**Compound 7**

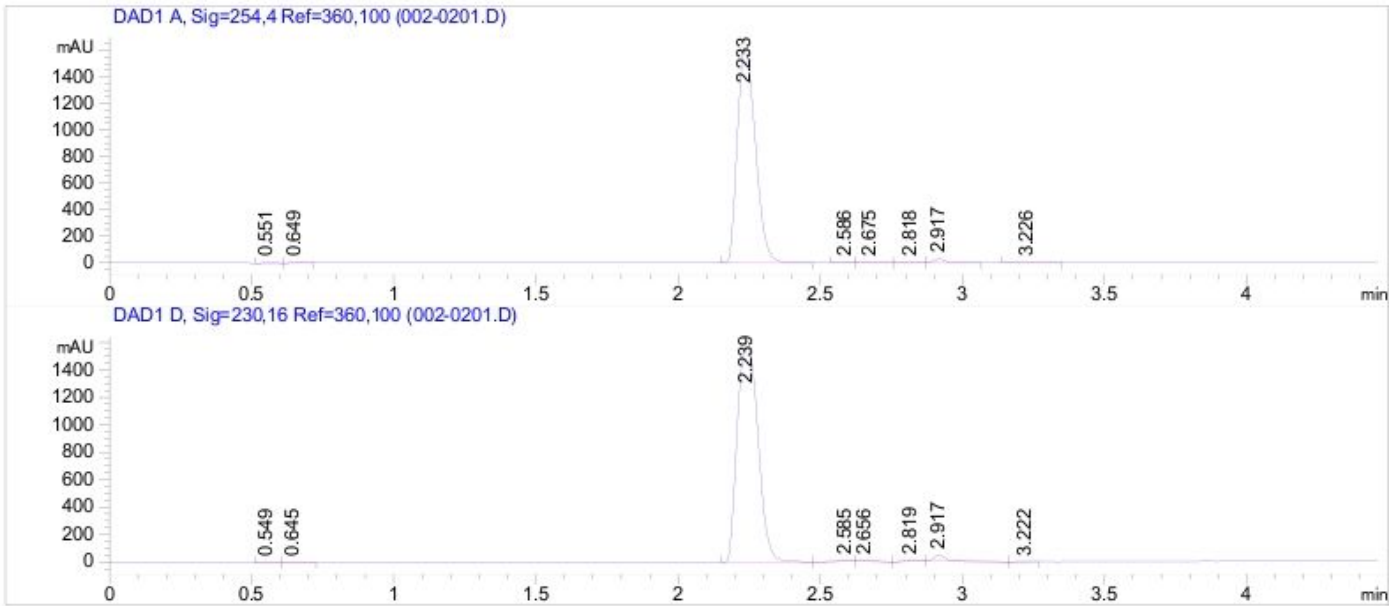

=====  
Area Percent Report  
=====

Sorted By : Signal  
Multiplier: : 1.0000  
Dilution: : 1.0000  
Use Multiplier & Dilution Factor with ISTDs

Signal 1: DAD1 A, Sig=254,4 Ref=360,100

| Peak # | RetTime [min] | Type | Width [min] | Area [mAU*s] | Height [mAU] | Area %  |
|--------|---------------|------|-------------|--------------|--------------|---------|
| 1      | 0.551         | BB   | 0.0440      | 20.79967     | 6.73318      | 0.2871  |
| 2      | 0.649         | BB   | 0.0384      | 8.32270      | 3.19299      | 0.1149  |
| 3      | 2.233         | BB   | 0.0714      | 7125.55713   | 1618.07104   | 98.3542 |
| 4      | 2.586         | BB   | 0.0373      | 6.01464      | 2.57073      | 0.0830  |
| 5      | 2.675         | BB   | 0.0788      | 7.19062      | 1.53099      | 0.0993  |
| 6      | 2.818         | BB   | 0.0505      | 8.99566      | 2.72732      | 0.1242  |
| 7      | 2.917         | BB   | 0.0405      | 61.47284     | 25.19331     | 0.8485  |
| 8      | 3.226         | BB   | 0.0666      | 6.43829      | 1.42934      | 0.0889  |

Totals : 7244.79156 1661.44890

Sample Name: T-2009

```
=====
Acq. Operator   : Tetra Discovery Partners      Seq. Line :    2
Acq. Instrument : Instrument 1                 Location  : Vial 2
Injection Date  : 1/13/2020 5:09:16 PM         Inj       :    1
                                                Inj Volume: 5.0 µl
Sequence File   : C:\Users\Public\Documents\Agilent1100\STD_SEQ 2020-01-13 17-01-50\STD_SEQ.S
Method          : C:\USERS\PUBLIC\DOCUMENTS\AGILENT1100\STD_SEQ 2020-01-13 17-01-50\STD_MTD.M (
                  Sequence Method)
Last changed    : 10/17/2019 4:57:20 PM by Tetra Discovery Partners
Method Info     : Standard method for small molecule separation
=====
```

**Compound 7**

Signal 2: DAD1 D, Sig=230,16 Ref=360,100

| Peak # | RetTime [min] | Type | Width [min] | Area [mAU*s] | Height [mAU] | Area %  |
|--------|---------------|------|-------------|--------------|--------------|---------|
| 1      | 0.549         | BB   | 0.0408      | 24.67207     | 8.26218      | 0.3006  |
| 2      | 0.645         | BB   | 0.0390      | 10.77763     | 4.05573      | 0.1313  |
| 3      | 2.239         | BB   | 0.0839      | 8027.73975   | 1563.24561   | 97.7997 |
| 4      | 2.585         | BB   | 0.0402      | 11.27485     | 4.67100      | 0.1374  |
| 5      | 2.656         | BB   | 0.0860      | 8.81802      | 1.66064      | 0.1074  |
| 6      | 2.819         | BB   | 0.0521      | 15.90209     | 4.62795      | 0.1937  |
| 7      | 2.917         | BB   | 0.0405      | 104.07726    | 42.66168     | 1.2679  |
| 8      | 3.222         | BB   | 0.0480      | 5.08581      | 1.74383      | 0.0620  |

Totals :                                    8208.34748 1630.92862

\*\*\* End of Report \*\*\*

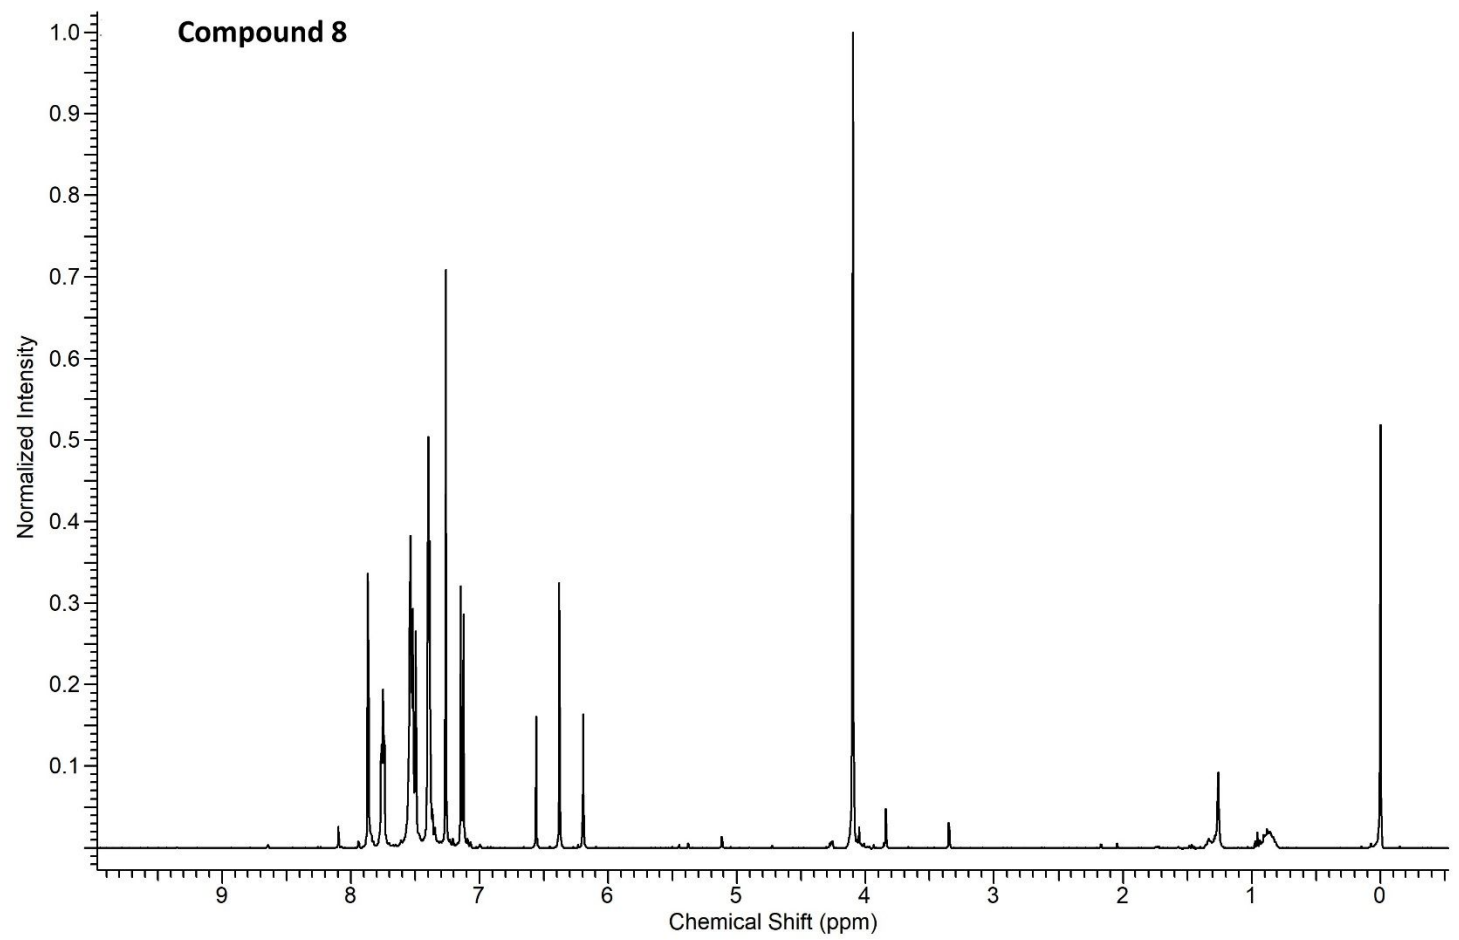



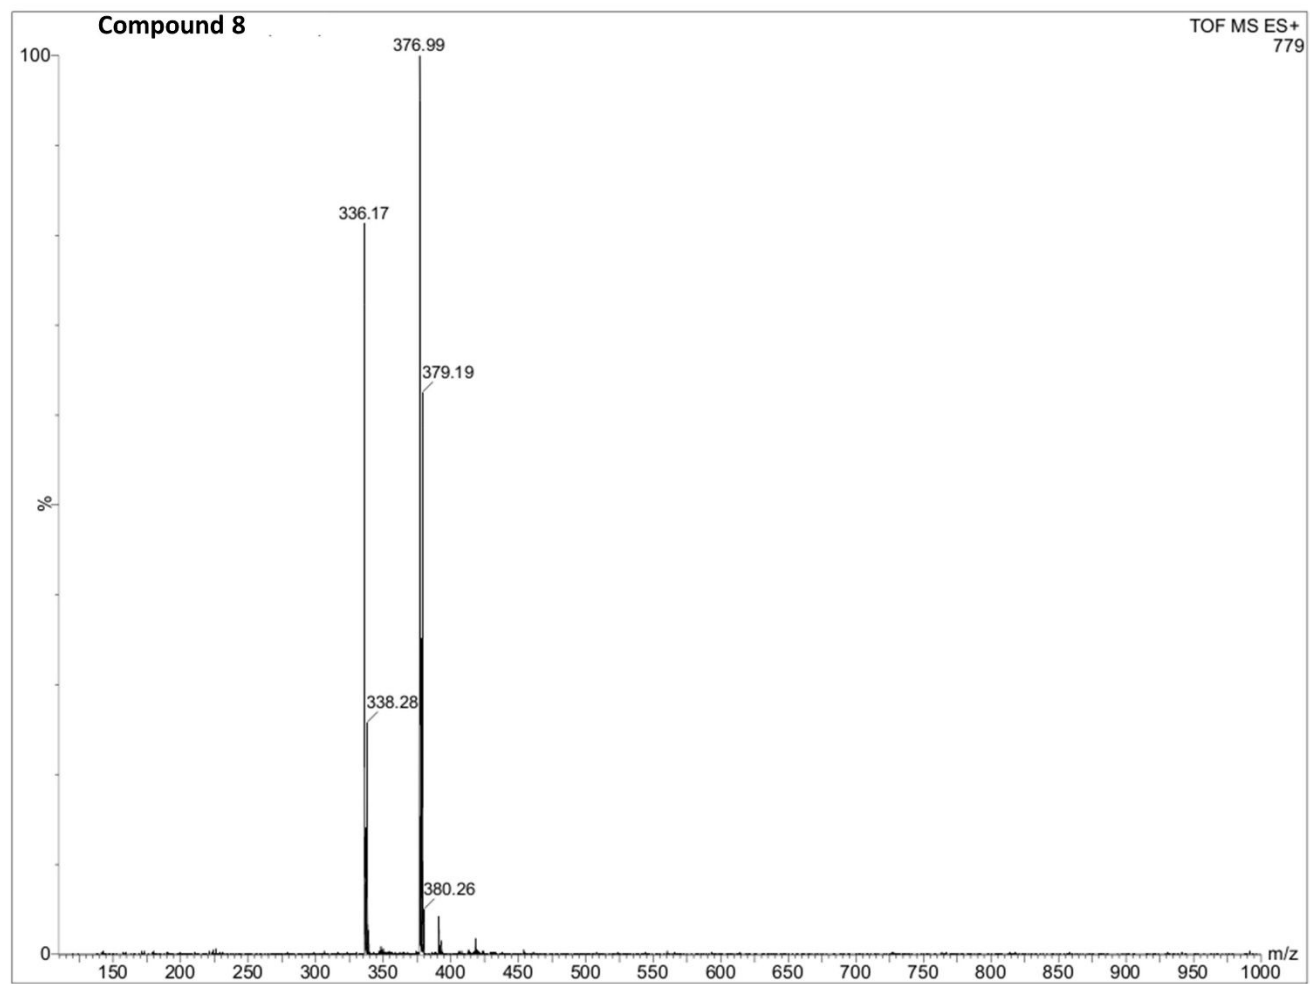

Sample Name: T-2517

=====

|                 |                                                                                                 |            |          |
|-----------------|-------------------------------------------------------------------------------------------------|------------|----------|
| Acq. Operator   | : Tetra Discovery Partners                                                                      | Seq. Line  | : 1      |
| Acq. Instrument | : Instrument 1                                                                                  | Location   | : Vial 1 |
| Injection Date  | : 1/13/2020 4:25:25 PM                                                                          | Inj        | : 1      |
|                 |                                                                                                 | Inj Volume | : 5.0 µl |
| Sequence File   | : C:\Users\Public\Documents\Agilent1100\STD_SEQ 2020-01-13 16-24-33\STD_SEQ.S                   |            |          |
| Method          | : C:\USERS\PUBLIC\DOCUMENTS\AGILENT1100\STD_SEQ 2020-01-13 16-24-33\STD_MTD.M (Sequence Method) |            |          |
| Last changed    | : 10/17/2019 4:57:20 PM by Tetra Discovery Partners                                             |            |          |
| Method Info     | : Standard method for small molecule separation                                                 |            |          |

=====

## Compound 8

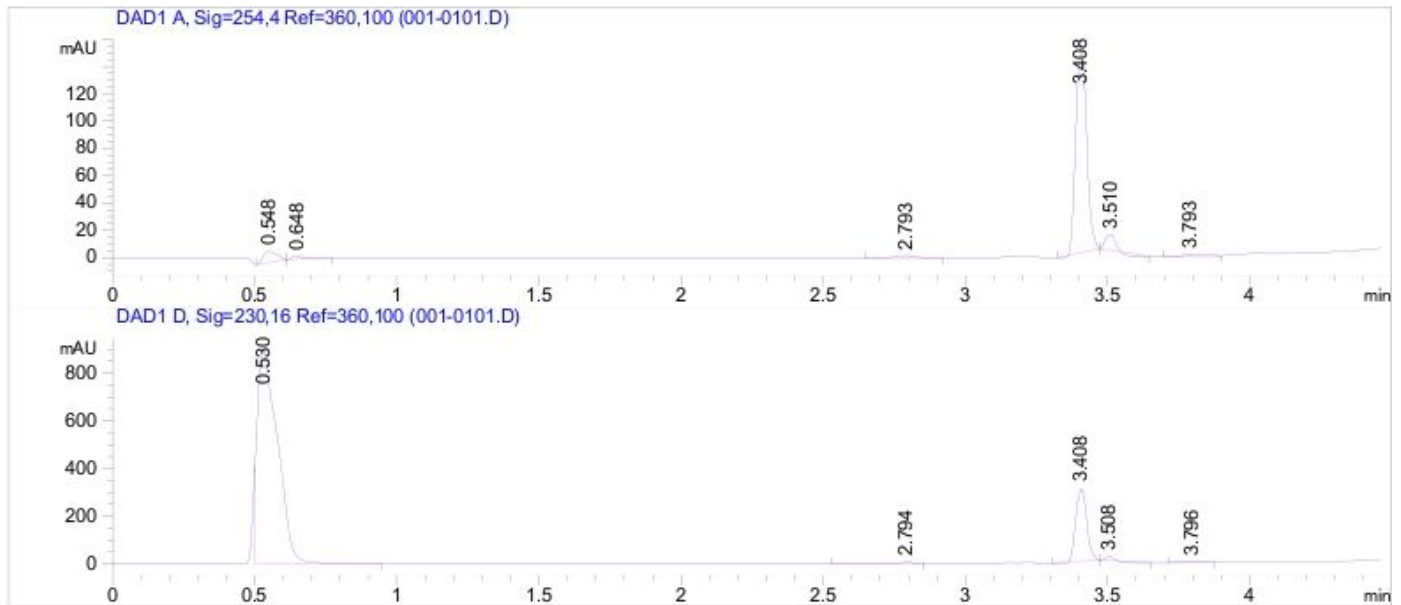

=====  
Area Percent Report  
=====

Sorted By : Signal  
Multiplier: : 1.0000  
Dilution: : 1.0000  
Use Multiplier & Dilution Factor with ISTDs

Signal 1: DAD1 A, Sig=254,4 Ref=360,100

| Peak # | RetTime [min] | Type | Width [min] | Area [mAU*s] | Height [mAU] | Area %  |
|--------|---------------|------|-------------|--------------|--------------|---------|
| 1      | 0.548         | BB   | 0.0464      | 27.47399     | 8.35339      | 5.8340  |
| 2      | 0.648         | BB   | 0.0414      | 7.44672      | 2.45165      | 1.5813  |
| 3      | 2.793         | BB   | 0.0709      | 9.88186      | 1.95694      | 2.0984  |
| 4      | 3.408         | BB   | 0.0432      | 398.36746    | 149.02811    | 84.5920 |
| 5      | 3.510         | BB   | 0.0336      | 21.82435     | 11.79237     | 4.6343  |
| 6      | 3.793         | BB   | 0.0545      | 5.93382      | 1.62932      | 1.2600  |

Totals : 470.92820 175.21178

Sample Name: T-2517

```
=====
Acq. Operator   : Tetra Discovery Partners       Seq. Line :    1
Acq. Instrument : Instrument 1                   Location  : Vial 1
Injection Date  : 1/13/2020 4:25:25 PM          Inj       :    1
                                                Inj Volume: 5.0 µl
Sequence File   : C:\Users\Public\Documents\Agilent1100\STD_SEQ 2020-01-13 16-24-33\STD_SEQ.S
Method          : C:\USERS\PUBLIC\DOCUMENTS\AGILENT1100\STD_SEQ 2020-01-13 16-24-33\STD_MTD.M (
                  Sequence Method)
Last changed    : 10/17/2019 4:57:20 PM by Tetra Discovery Partners
Method Info     : Standard method for small molecule separation
=====
```

**Compound 8**

Signal 2: DAD1 D, Sig=230,16 Ref=360,100

| Peak # | RetTime [min] | Type | Width [min] | Area [mAU*s] | Height [mAU] | Area %  |
|--------|---------------|------|-------------|--------------|--------------|---------|
| 1      | 0.530         | BB   | 0.0693      | 4468.31348   | 909.69635    | 83.9057 |
| 2      | 2.794         | BB   | 0.0489      | 15.79040     | 4.99276      | 0.2965  |
| 3      | 3.408         | BB   | 0.0432      | 820.19733    | 306.69583    | 15.4016 |
| 4      | 3.508         | BB   | 0.0235      | 15.11948     | 15.29594     | 0.2839  |
| 5      | 3.796         | BB   | 0.0561      | 5.97869      | 1.58137      | 0.1123  |

Totals :                        5325.39938 1238.26225

=====

\*\*\* End of Report \*\*\*

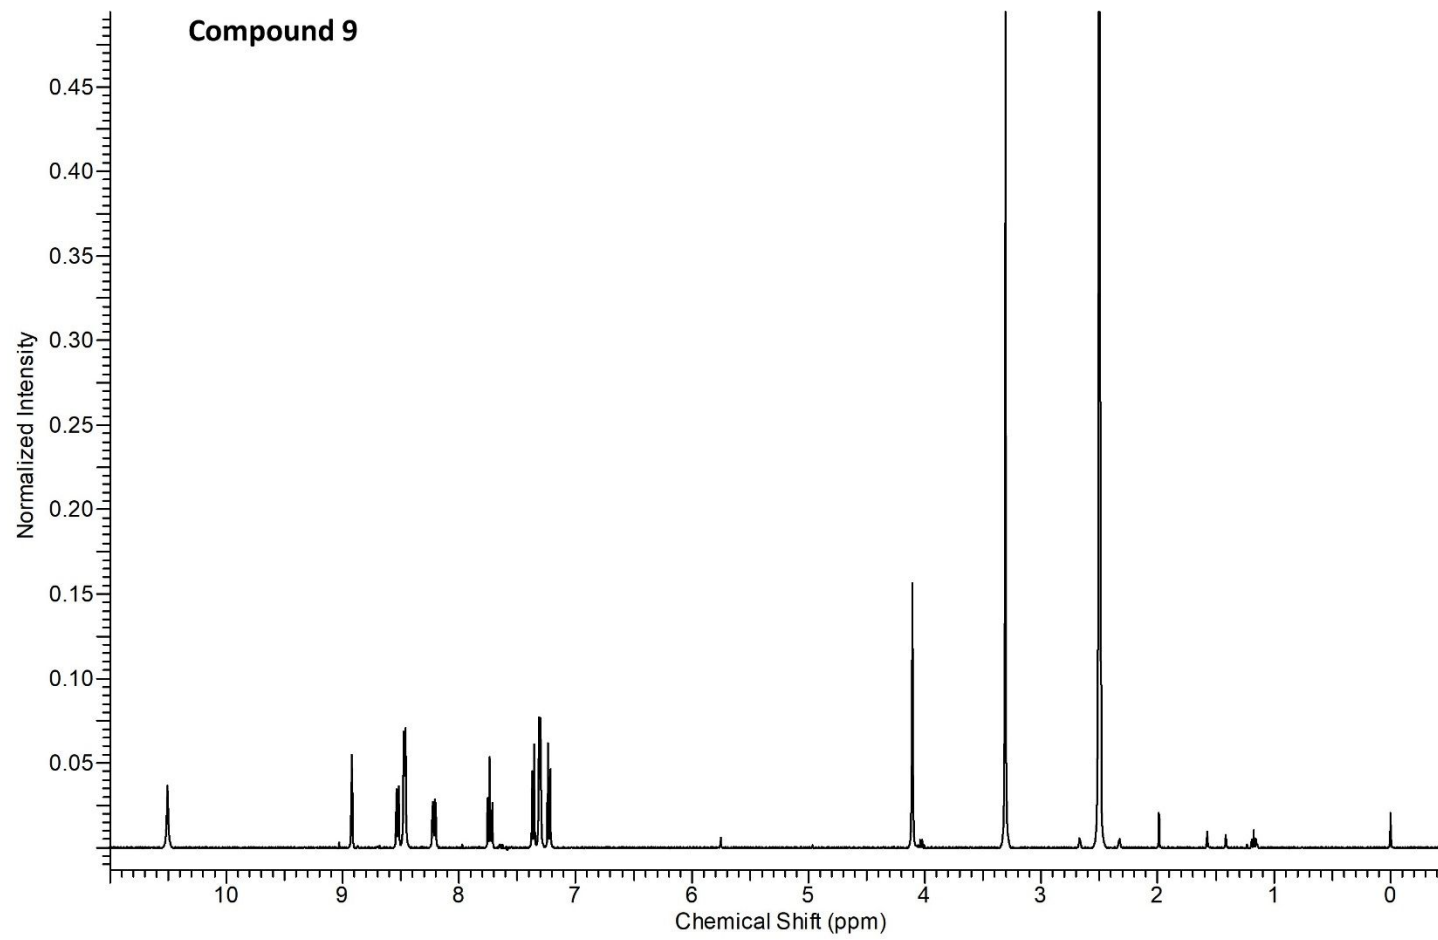

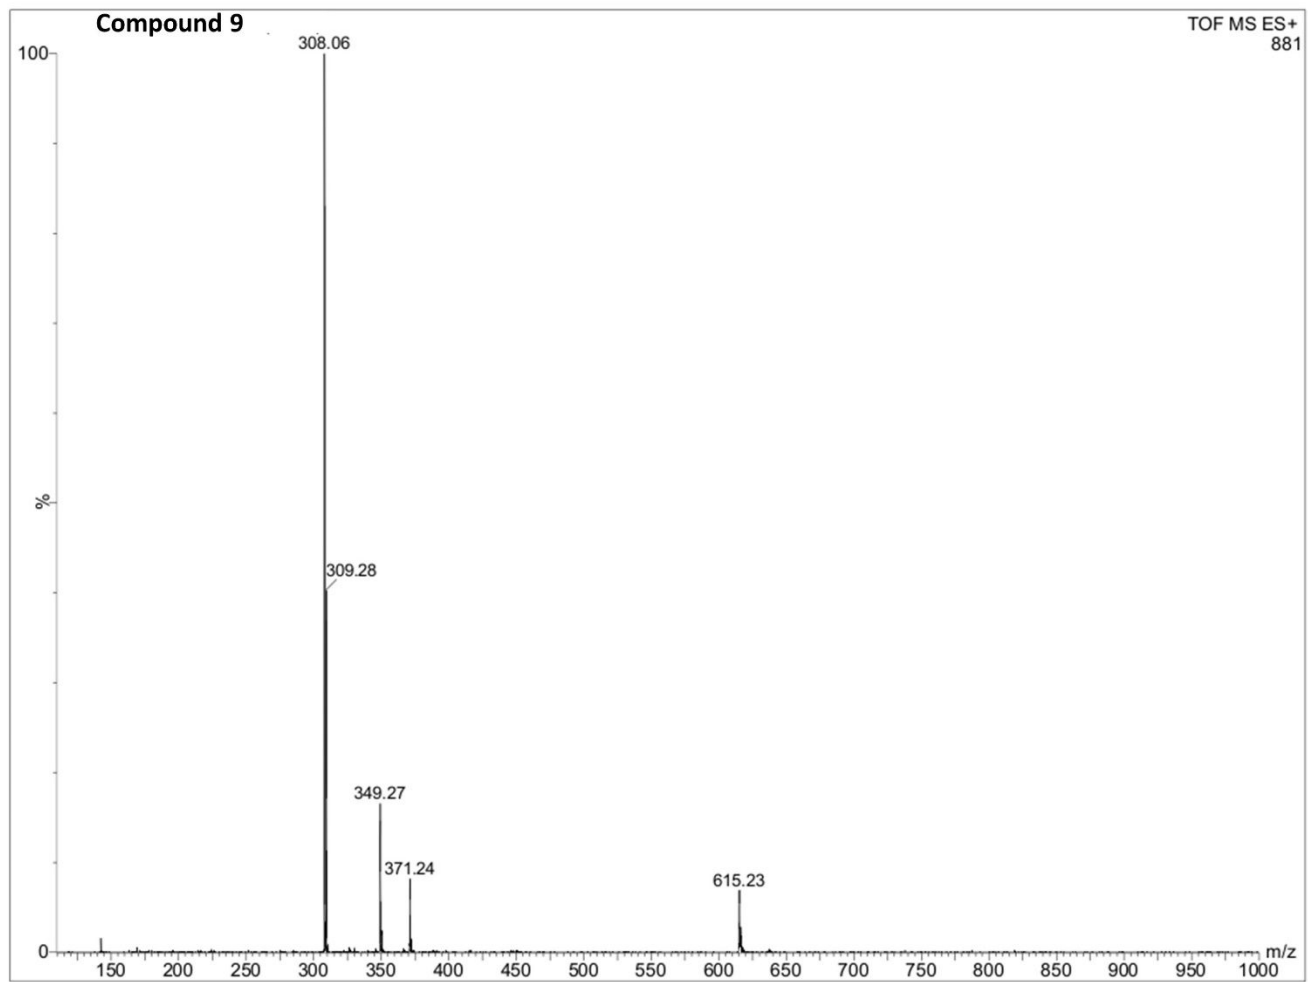

Sample Name: T-1842

```

=====
Acq. Operator   : Tetra Discovery Partners      Seq. Line :    1
Acq. Instrument : Instrument 1                  Location  : Vial 1
Injection Date  : 1/13/2020 5:03:09 PM        Inj       :    1
                                           Inj Volume: 5.0 µl
Sequence File   : C:\Users\Public\Documents\Agilent1100\STD_SEQ 2020-01-13 17-01-50\STD_SEQ.S
Method          : C:\USERS\PUBLIC\DOCUMENTS\AGILENT1100\STD_SEQ 2020-01-13 17-01-50\STD_MTD.M (
                  Sequence Method)
Last changed    : 10/17/2019 4:57:20 PM by Tetra Discovery Partners
Method Info     : Standard method for small molecule separation
=====

```

**Compound 9**

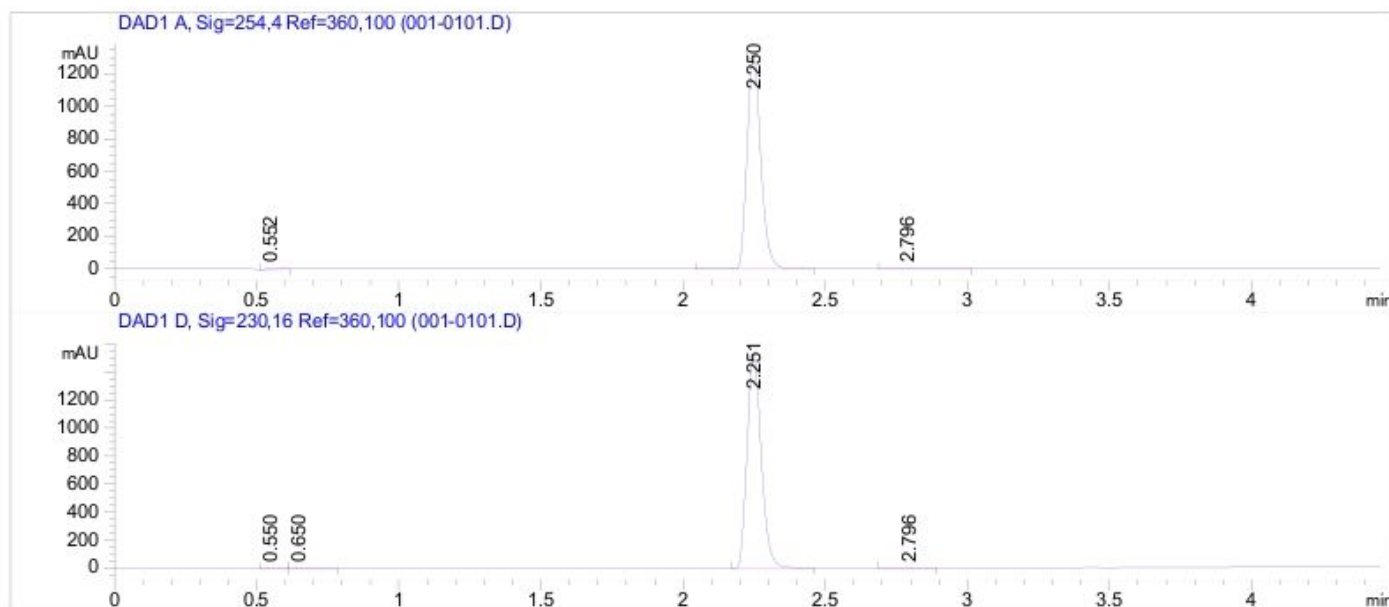

```

=====
Area Percent Report
=====

```

```

Sorted By           :      Signal
Multiplier:         :      1.0000
Dilution:           :      1.0000
Use Multiplier & Dilution Factor with ISTDs

```

Signal 1: DAD1 A, Sig=254,4 Ref=360,100

| Peak # | RetTime [min] | Type | Width [min] | Area [mAU*s] | Height [mAU] | Area %  |
|--------|---------------|------|-------------|--------------|--------------|---------|
| 1      | 0.552         | BB   | 0.0443      | 19.45042     | 6.25359      | 0.4405  |
| 2      | 2.250         | BB   | 0.0527      | 4386.11084   | 1320.84546   | 99.3406 |
| 3      | 2.796         | BB   | 0.0737      | 9.66268      | 1.82679      | 0.2188  |

```
Totals :                4415.22394 1328.92584
```

Sample Name: T-1842

```
=====
Acq. Operator   : Tetra Discovery Partners      Seq. Line :    1
Acq. Instrument : Instrument 1                 Location  : Vial 1
Injection Date  : 1/13/2020 5:03:09 PM         Inj       :    1
                                           Inj Volume: 5.0 µl
Sequence File   : C:\Users\Public\Documents\Agilent1100\STD_SEQ 2020-01-13 17-01-50\STD_SEQ.S
Method          : C:\USERS\PUBLIC\DOCUMENTS\AGILENT1100\STD_SEQ 2020-01-13 17-01-50\STD_MTD.M (
                  Sequence Method)
Last changed    : 10/17/2019 4:57:20 PM by Tetra Discovery Partners
Method Info     : Standard method for small molecule separation
=====
```

|                   |
|-------------------|
| <b>Compound 9</b> |
|-------------------|

Signal 2: DAD1 D, Sig=230,16 Ref=360,100

| Peak # | RetTime [min] | Type | Width [min] | Area [mAU*s] | Height [mAU] | Area %  |
|--------|---------------|------|-------------|--------------|--------------|---------|
| 1      | 0.550         | BB   | 0.0438      | 24.93855     | 8.13513      | 0.4693  |
| 2      | 0.650         | BB   | 0.0427      | 9.65048      | 3.24490      | 0.1816  |
| 3      | 2.251         | BB   | 0.0541      | 5273.07471   | 1532.46899   | 99.2205 |
| 4      | 2.796         | BB   | 0.0576      | 6.83724      | 1.74887      | 0.1287  |

Totals :                      5314.50097 1545.59790

\*\*\* End of Report \*\*\*

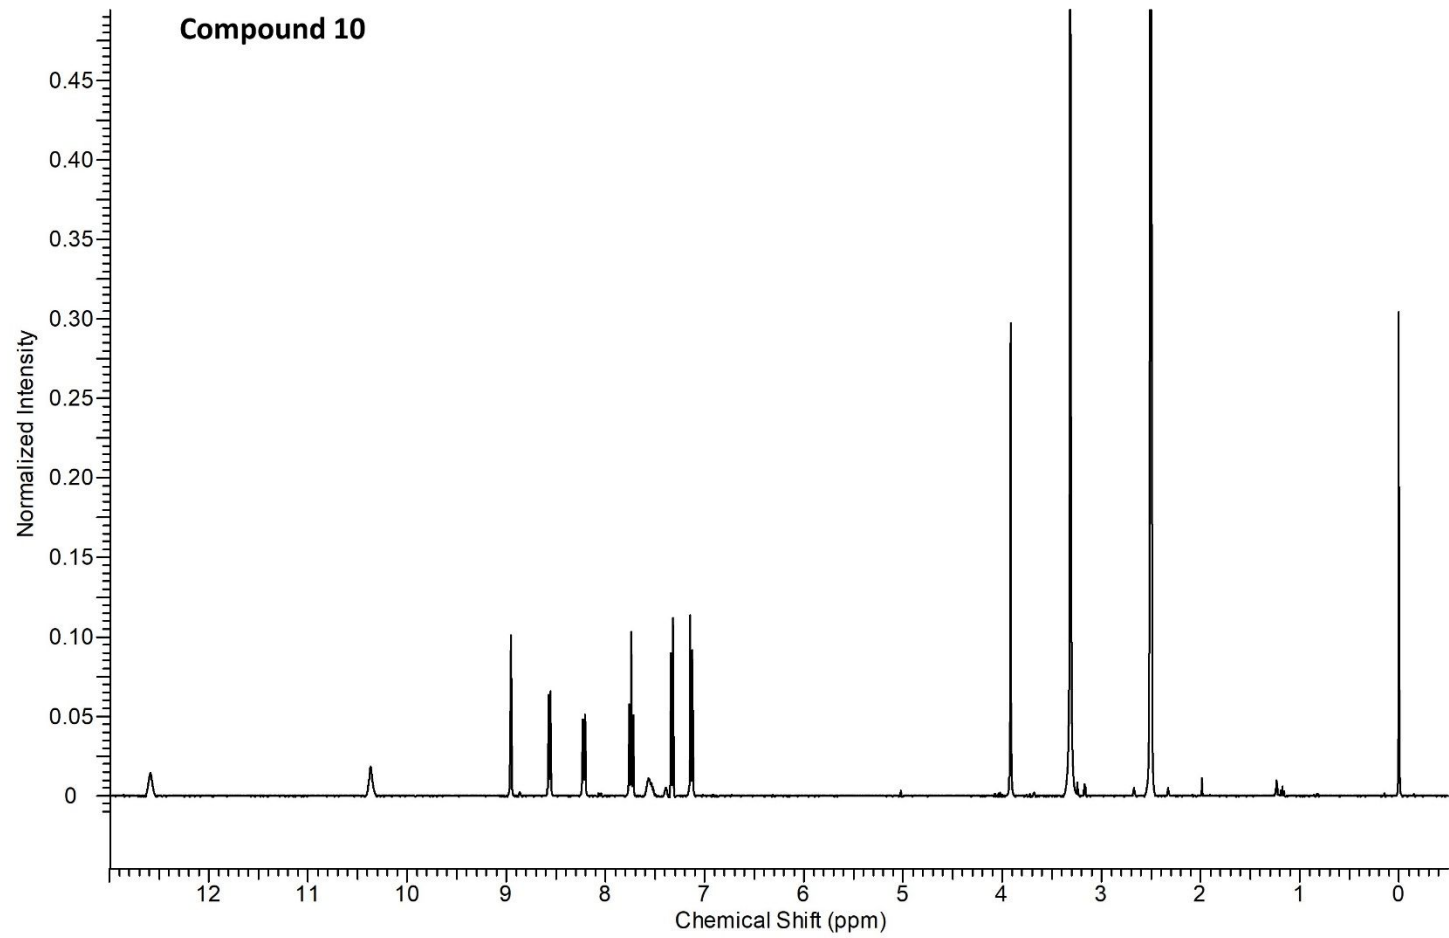



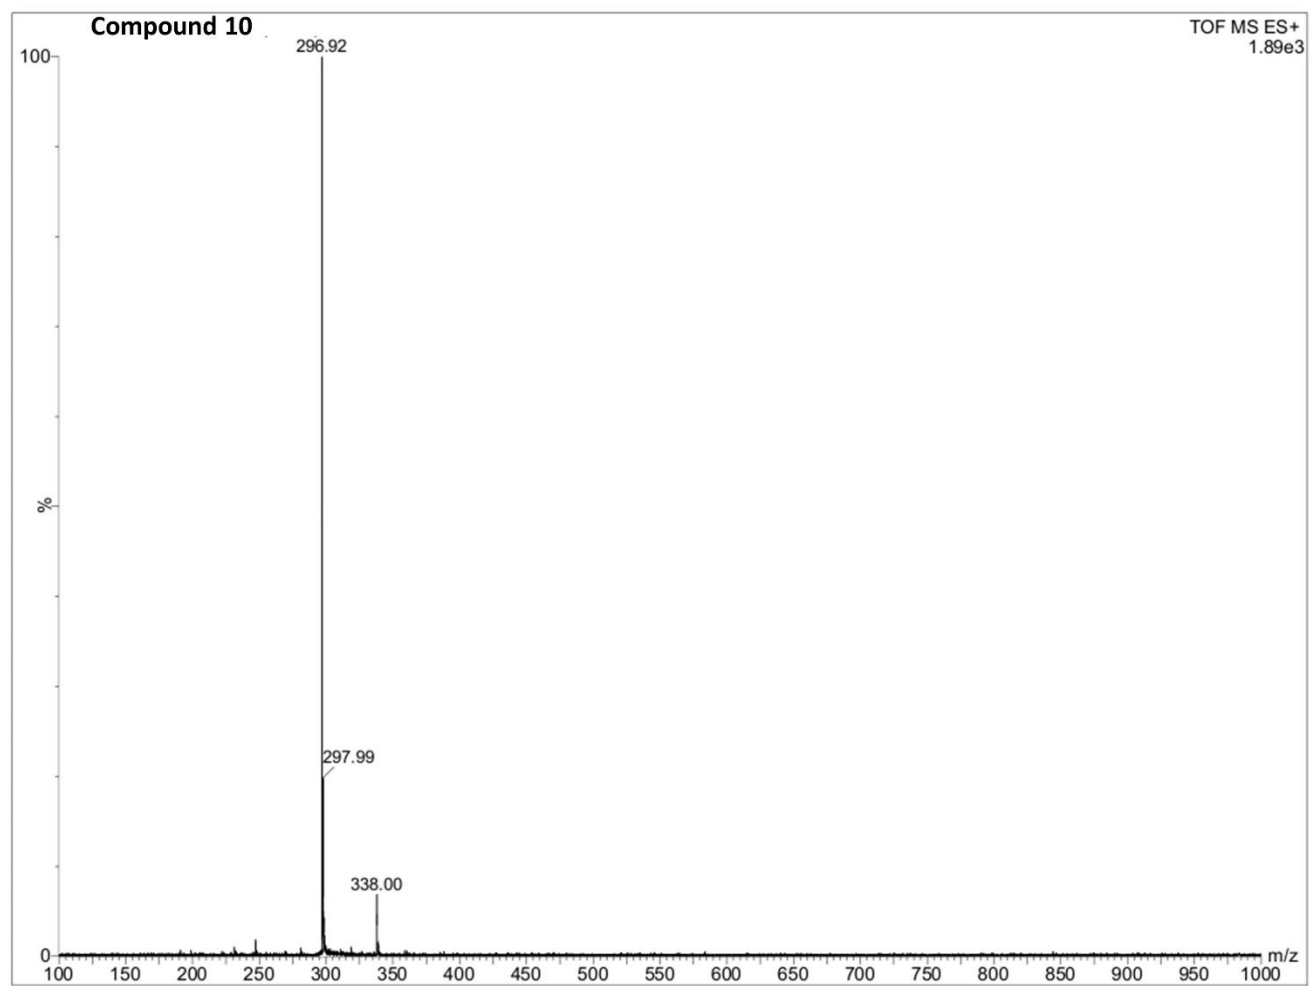

=====

|                 |   |                                                   |            |   |         |
|-----------------|---|---------------------------------------------------|------------|---|---------|
| Acq. Operator   | : |                                                   | Seq. Line  | : | 1       |
| Acq. Instrument | : | Instrument 1                                      | Location   | : | Vial 41 |
| Injection Date  | : | 12/12/2017 12:38:43 PM                            | Inj        | : | 1       |
|                 |   |                                                   | Inj Volume | : | 5.0 µl  |
| Acq. Method     | : | P:\HPLCKX4\DATA\HPLCKX4 2017-12-12 12-37-19\Z50.M |            |   |         |
| Last changed    | : | 9/6/2017 12:28:06 PM                              |            |   |         |
| Analysis Method | : | C:\CHEM32\1\METHODS\DEF_LC.M                      |            |   |         |
| Last changed    | : | 12/13/2017 2:11:35 PM                             |            |   |         |
|                 |   | (modified after loading)                          |            |   |         |
| Additional Info | : | Peak(s) manually integrated                       |            |   |         |

**Compound 10**

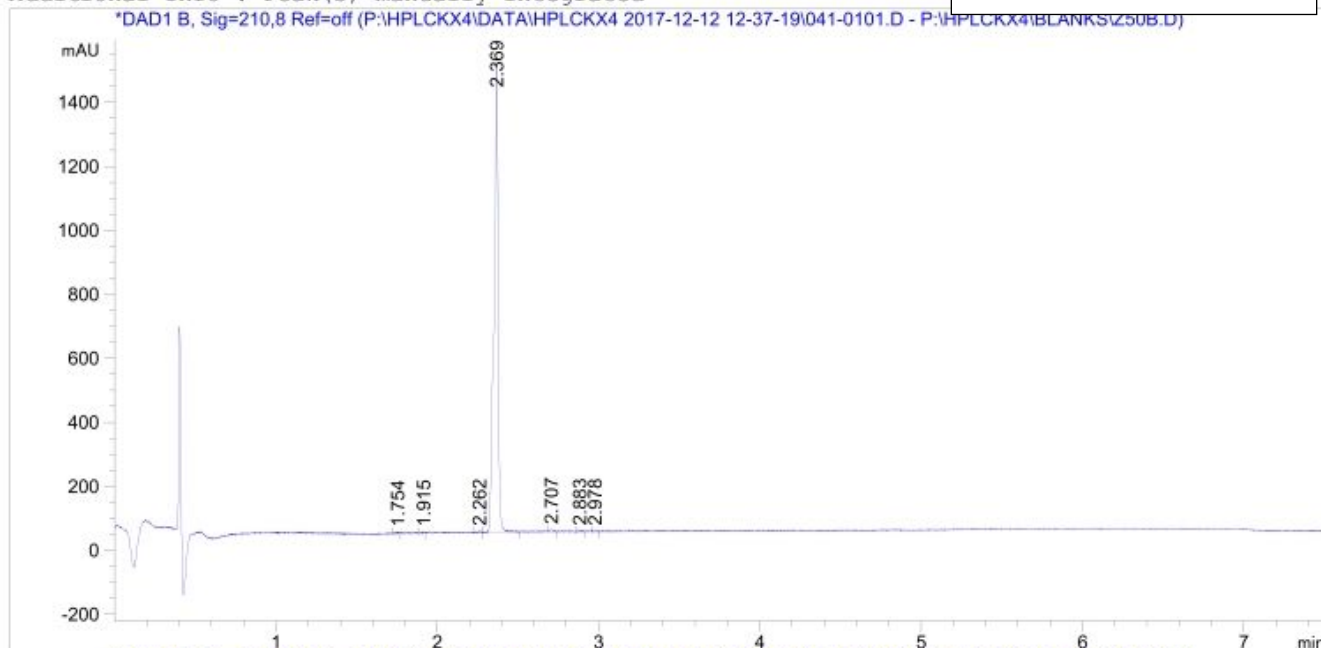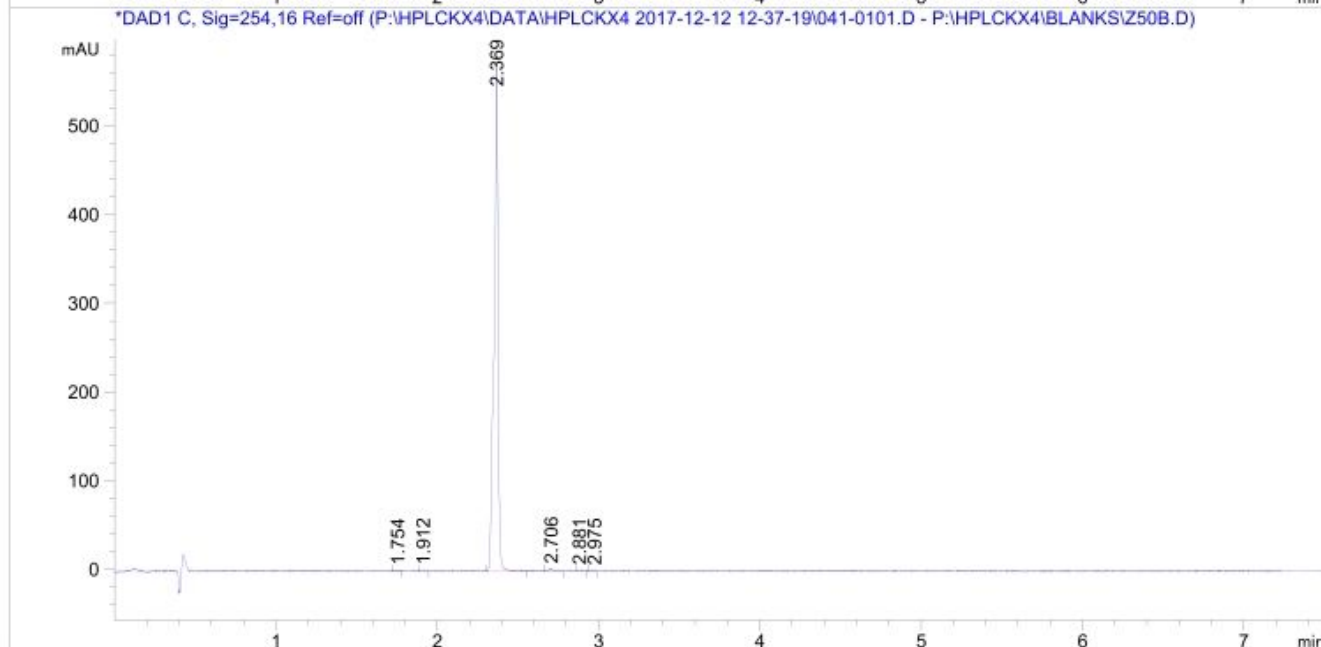

```

=====
                          Area Percent Report
=====

```

```

Sorted By      :      Signal
Multiplier    :      1.0000
Dilution      :      1.0000
Use Multiplier & Dilution Factor with ISTDs

```

**Compound 10**

```

Signal 1: DAD1 B, Sig=210,8 Ref=off
Signal has been modified after loading from rawdata file!

```

| Peak # | RetTime [min] | Type | Width [min] | Area [mAU*s] | Height [mAU] | Area %  |
|--------|---------------|------|-------------|--------------|--------------|---------|
| 1      | 1.754         | BV   | 0.0142      | 7.35588      | 6.50598      | 0.2876  |
| 2      | 1.915         | BB   | 0.0123      | 5.81374      | 6.40295      | 0.2273  |
| 3      | 2.262         | BV   | 0.0195      | 12.87690     | 7.89297      | 0.5034  |
| 4      | 2.369         | VB   | 0.0247      | 2499.27222   | 1441.28113   | 97.6996 |
| 5      | 2.707         | BB   | 0.0158      | 10.80134     | 8.67032      | 0.4222  |
| 6      | 2.883         | BV   | 0.0265      | 13.45817     | 6.81933      | 0.5261  |
| 7      | 2.978         | BB   | 0.0223      | 8.54099      | 5.15849      | 0.3339  |

```
Totals :                2558.11924 1482.73116
```

```

Signal 2: DAD1 C, Sig=254,16 Ref=off
Signal has been modified after loading from rawdata file!

```

| Peak # | RetTime [min] | Type | Width [min] | Area [mAU*s] | Height [mAU] | Area %  |
|--------|---------------|------|-------------|--------------|--------------|---------|
| 1      | 1.754         | BB   | 0.0196      | 2.37219      | 1.49159      | 0.2413  |
| 2      | 1.912         | BB   | 0.0203      | 3.18693      | 1.98156      | 0.3242  |
| 3      | 2.369         | BB   | 0.0235      | 966.31439    | 570.21277    | 98.3069 |
| 4      | 2.706         | BB   | 0.0236      | 5.94882      | 3.10076      | 0.6052  |
| 5      | 2.881         | BB   | 0.0228      | 3.38616      | 1.80849      | 0.3445  |
| 6      | 2.975         | BB   | 0.0159      | 1.74863      | 1.37248      | 0.1779  |

```
Totals :                982.95712 579.96765
```

```

=====
*** End of Report ***

```
